# Supplementary material for: The effect of the disposition of coordinated oxygen atoms on the magnitude of the energy barrier for magnetization reversal in a family of linear trinuclear Zn–Dy–Zn complexes with a square-antiprism DyO8coordination sphere
Source: Royal Society of Chemistry journal article supplement (doi:10.1039/c7dt00138j), 2017-01-01
Supplement: c7dt00138j1.pdf [file c7dt00138j1.pdf]

## **SUPPORTING INFORMATION**

**The effect of the disposition of coordinated oxygen atoms on the magnitude of the energy barrier for magnetization reversal in a family of linear trinuclear Zn-Dy-Zn complexes with square-antiprism DyO<sub>8</sub> coordination sphere**

Itziar Oyarzabal, Antonio Rodríguez-Diéguez, Montserrat Barquin, José M. Seco and Enrique Colacio

**Table S.1.-** Crystallographic data for complexes **1-6**.

| <b>Complex</b>                                           | <b>1</b>                                                                                                          | <b>2</b>                                                                                          | <b>3</b>                                                                                          | <b>4</b>                                                                                                         | <b>5</b>                                                                                                         | <b>6</b>                                                                                           |
|----------------------------------------------------------|-------------------------------------------------------------------------------------------------------------------|---------------------------------------------------------------------------------------------------|---------------------------------------------------------------------------------------------------|------------------------------------------------------------------------------------------------------------------|------------------------------------------------------------------------------------------------------------------|----------------------------------------------------------------------------------------------------|
| Formula                                                  | C <sub>41</sub> H <sub>44</sub> N <sub>5</sub> O <sub>12</sub> Cl <sub>2</sub> Br <sub>4</sub> Zn <sub>2</sub> Dy | C <sub>42</sub> H <sub>52</sub> N <sub>4</sub> O <sub>12</sub> Br <sub>9</sub> Zn <sub>3</sub> Dy | C <sub>43</sub> H <sub>52</sub> N <sub>5</sub> O <sub>14</sub> Br <sub>6</sub> Zn <sub>2</sub> Dy | C <sub>41</sub> H <sub>44</sub> N <sub>4</sub> O <sub>12</sub> Br <sub>4</sub> I <sub>3</sub> Zn <sub>2</sub> Dy | C <sub>43</sub> H <sub>52</sub> N <sub>5</sub> O <sub>14</sub> Br <sub>4</sub> I <sub>2</sub> Zn <sub>2</sub> Dy | C <sub>41</sub> H <sub>46</sub> N <sub>11</sub> O <sub>13</sub> Br <sub>4</sub> Zn <sub>2</sub> Dy |
| <i>M<sub>r</sub></i>                                     | 1482.59                                                                                                           | 1882.67                                                                                           | 1635.59                                                                                           | 1778.38                                                                                                          | 1729.57                                                                                                          | 1513.77                                                                                            |
| Crystal system                                           | Triclinic                                                                                                         | Monoclinic                                                                                        | Monoclinic                                                                                        | Monoclinic                                                                                                       | Monoclinic                                                                                                       | Triclinic                                                                                          |
| Space group (no.)                                        | <i>P</i> -1 (2)                                                                                                   | <i>P</i> 21/ <i>n</i> (14)                                                                        | <i>P</i> 21/ <i>c</i> (14)                                                                        | <i>P</i> 21/ <i>c</i> (14)                                                                                       | <i>P</i> 21/ <i>c</i> (14)                                                                                       | <i>P</i> -1 (2)                                                                                    |
| <i>a</i> (Å)                                             | 11.820(2)                                                                                                         | 14.6756(11)                                                                                       | 14.6274(3)                                                                                        | 14.9193(3)                                                                                                       | 14.7655(3)                                                                                                       | 13.6069(7)                                                                                         |
| <i>b</i> (Å)                                             | 12.875(2)                                                                                                         | 13.0146(9)                                                                                        | 27.3664(5)                                                                                        | 25.4989(3)                                                                                                       | 27.0577(4)                                                                                                       | 13.8358(9)                                                                                         |
| <i>c</i> (Å)                                             | 15.948(3)                                                                                                         | 30.607(2)                                                                                         | 14.7306(4)                                                                                        | 15.6761(3)                                                                                                       | 15.1740(3)                                                                                                       | 15.9283(7)                                                                                         |
| <i>a</i> (°)                                             | 98.179(3)                                                                                                         | 90                                                                                                | 90                                                                                                | 90                                                                                                               | 90                                                                                                               | 99.998(5)                                                                                          |
| <i>β</i> (°)                                             | 94.615(3)                                                                                                         | 93.627(2)                                                                                         | 115.170(3)                                                                                        | 116.881(2)                                                                                                       | 115.552(2)                                                                                                       | 108.143(5)                                                                                         |
| <i>γ</i> (°)                                             | 91.774(3)                                                                                                         | 90                                                                                                | 90                                                                                                | 90                                                                                                               | 90                                                                                                               | 106.028(5)                                                                                         |
| <i>V</i> (Å <sup>3</sup> )                               | 2392.2(7)                                                                                                         | 5834.1(7)                                                                                         | 5336.8(2)                                                                                         | 5319.21(18)                                                                                                      | 5469.39(19)                                                                                                      | 2625.9(3)                                                                                          |
| <i>Z</i>                                                 | 2                                                                                                                 | 4                                                                                                 | 4                                                                                                 | 4                                                                                                                | 4                                                                                                                | 2                                                                                                  |
| <i>D<sub>c</sub></i> (g cm <sup>-3</sup> )               | 2.058                                                                                                             | 2.143                                                                                             | 2.036                                                                                             | 2.221                                                                                                            | 2.100                                                                                                            | 1.851                                                                                              |
| <i>m</i> (MoK <sub>α</sub> ) (mm <sup>-1</sup> )         | 6.058                                                                                                             | 8.705                                                                                             | 6.836                                                                                             | 7.090                                                                                                            | 6.338                                                                                                            | 5.421                                                                                              |
| <i>T</i> (K)                                             | 100(2)                                                                                                            | 100(2)                                                                                            | 100(2)                                                                                            | 100(2)                                                                                                           | 100(2)                                                                                                           | 100(2)                                                                                             |
| Observed reflections                                     | 10772 (9031)                                                                                                      | 14924 (12409)                                                                                     | 11840 (8854)                                                                                      | 12209 (10629)                                                                                                    | 12541 (10581)                                                                                                    | 11643 (7756)                                                                                       |
| <i>R<sub>int</sub></i>                                   | 0.0442                                                                                                            | 0.0664                                                                                            | 0.0564                                                                                            | 0.0325                                                                                                           | 0.0331                                                                                                           | 0.0610                                                                                             |
| Parameters                                               | 610                                                                                                               | 647                                                                                               | 650                                                                                               | 609                                                                                                              | 627                                                                                                              | 590                                                                                                |
| <i>GOF</i>                                               | 1.009                                                                                                             | 1.065                                                                                             | 1.026                                                                                             | 1.053                                                                                                            | 1.051                                                                                                            | 0.951                                                                                              |
| <i>R<sub>I</sub></i> <sup>a,b</sup>                      | 0.0444 (0.0352)                                                                                                   | 0.0698 (0.0551)                                                                                   | 0.0811 (0.0533)                                                                                   | 0.0545 (0.0460)                                                                                                  | 0.0558 (0.0441)                                                                                                  | 0.0959 (0.0587)                                                                                    |
| <i>wR<sub>2</sub></i> <sup>c</sup>                       | 0.0832 (0.0785)                                                                                                   | 0.1357 (0.1254)                                                                                   | 0.1235 (0.1085)                                                                                   | 0.1225 (0.1177)                                                                                                  | 0.1083 (0.1022)                                                                                                  | 0.1254 (0.1114)                                                                                    |
| Largest difference in peak and hole (e Å <sup>-3</sup> ) | 1.599 and -0.735                                                                                                  | 3.740 and -3.322                                                                                  | 2.139 and -2.347                                                                                  | 2.041 and -4.678                                                                                                 | 5.120 and -1.786                                                                                                 | 1.858 and -1.692                                                                                   |

<sup>a</sup>  $R_I = \sum ||F_o| - |F_c|| / \sum |F_o|$ . <sup>b</sup> Values in parentheses for reflections with  $I > 2s(I)$ . <sup>c</sup>  $wR_2 = \{ \sum [w(F_o^2 - F_c^2)^2] / \sum [w(F_o^2)^2] \}^{1/2}$

**Table S.2.-** Selected bond lengths (Å) and angles (°) for complexes **1-6**.

| <b>Complex</b> | <b>1</b> | <b>2</b> | <b>3</b> | <b>4</b> | <b>5</b>  | <b>6</b> |
|----------------|----------|----------|----------|----------|-----------|----------|
| Dy(1)···Zn(1)  | 3.553(1) | 3.573(1) | 3.569(1) | 3.568(1) | 3.571(1)  | 3.568(1) |
| Dy(1)···Zn(2)  | 3.534(1) | 3.572(1) | 3.562(1) | 3.546(1) | 3.564(1)  | 3.591(1) |
| Dy(1)-O(1A)    | 2.385(3) | 2.393(4) | 2.385(4) | 2.378(5) | 2.389(5)  | 2.364(5) |
| Dy(1)-O(2A)    | 2.290(3) | 2.335(4) | 2.321(5) | 2.329(5) | 2.243(4)  | 2.350(5) |
| Dy(1)-O(3A)    | 2.321(3) | 2.235(4) | 2.239(4) | 2.246(5) | 2.333(4)  | 2.263(4) |
| Dy(1)-O(4A)    | 2.392(3) | 2.448(4) | 2.393(5) | 2.414(5) | 2.390(4)  | 2.454(5) |
| Dy(1)-O(1B)    | 2.388(3) | 2.405(4) | 2.408(5) | 2.387(5) | 2.403(4)  | 2.397(5) |
| Dy(1)-O(2B)    | 2.303(3) | 2.330(4) | 2.277(5) | 2.322(5) | 2.310(4)  | 2.340(4) |
| Dy(1)-O(3B)    | 2.317(3) | 2.251(4) | 2.316(5) | 2.264(5) | 2.279(4)  | 2.261(5) |
| Dy(1)-O(4B)    | 2.374(3) | 2.426(4) | 2.401(4) | 2.416(5) | 2.405(5)  | 2.412(5) |
| Zn(1)-N(1A)    | 2.123(3) | 2.173(5) | 2.151(6) | 2.169(6) | 2.141(5)  | 2.133(6) |
| Zn(1)-N(2A)    | 2.145(3) | 2.102(5) | 2.145(6) | 2.124(6) | 2.158(5)  | 2.111(6) |
| Zn(1)-O(2A)    | 2.137(3) | 2.055(4) | 2.081(4) | 2.098(5) | 2.101(4)  | 2.044(5) |
| Zn(1)-O(3A)    | 2.066(3) | 2.148(4) | 2.078(5) | 2.100(5) | 2.078(4)  | 2.125(5) |
| Zn(1)-X(1A)    | 2.214(1) | 2.356(1) | 2.360(1) | 2.556(1) | 2.5421(8) | 1.992(6) |

**Table S.2.-** Continuation.

| <b>Complex</b>    | <b>1</b>   | <b>2</b>    | <b>3</b>   | <b>4</b>   | <b>5</b>    | <b>6</b>  |
|-------------------|------------|-------------|------------|------------|-------------|-----------|
| Zn(2)-N(1B)       | 2.138(4)   | 2.163(5)    | 2.098(5)   | 2.182(6)   | 2.188(5)    | 2.154(6)  |
| Zn(2)-N(2B)       | 2.153(4)   | 2.122(5)    | 2.186(6)   | 2.115(6)   | 2.105(5)    | 2.114(6)  |
| Zn(2)-O(2B)       | 2.087(3)   | 2.057(4)    | 2.166(5)   | 2.058(5)   | 2.043(4)    | 2.058(4)  |
| Zn(2)-O(3B)       | 2.101(3)   | 2.142(4)    | 2.047(5)   | 2.156(5)   | 2.171(4)    | 2.147(5)  |
| Zn(2)-X(1B)       | 2.218(1)   | 2.355(1)    | 2.372(1)   | 2.570(1)   | 2.559(1)    | 1.971(7)  |
| Zn(3)-Br(1C)      |            | 2.378(2)    |            |            |             |           |
| Zn(3)-Br(2C)      |            | 2.385(2)    |            |            |             |           |
| Zn(3)-Br(3C)      |            | 2.350(2)    |            |            |             |           |
| Zn(3)-O(4M)       |            | 2.009(8)    |            |            |             |           |
| Dy(1)-O(2A)-Zn(1) | 106.73(11) | 108.82(17)  | 108.23(19) | 107.29(19) | 110.55(17)  | 108.4(2)  |
| Dy(1)-O(3A)-Zn(1) | 108.08(11) | 109.20(17)  | 111.5(2)   | 110.3(2)   | 107.97(17)  | 108.8(2)  |
| Dy(1)-O(2B)-Zn(2) | 107.16(11) | 108.87(17)  | 106.59(19) | 107.99(19) | 109.73(18)  | 109.3(2)  |
| Dy(1)-O(3B)-Zn(2) | 106.18(11) | 108.79(17)  | 109.3(2)   | 106.68(19) | 106.38(17)  | 109.1(2)  |
| O(2A)-Zn(1)-O(3A) | 75.96(10)  | 74.23(15)   | 73.79(18)  | 74.62(18)  | 74.29(15)   | 75.56(18) |
| O(2B)-Zn(2)-O(3B) | 76.47(10)  | 74.30(15)   | 75.46(18)  | 75.69(18)  | 75.23(16)   | 74.25(18) |
| O(2A)-Dy(1)-O(3A) | 68.26(9)   | 67.41(14)   | 66.36(16)  | 67.55(17)  | 66.91(14)   | 67.24(16) |
| O(2B)-Dy(1)-O(3B) | 68.28(9)   | 67.22(14)   | 68.32(16)  | 68.66(16)  | 68.24(14)   | 66.97(17) |
| Zn(1)-Dy(1)-Zn(2) | 105.94(2)  | 143.743(17) | 146.77(2)  | 146.95(2)  | 146.249(18) | 141.56(2) |

**Table S.3.-** Shape measures for Dy(III) coordination environments in complexes **1-6**.

| Complex  | SAPR-8 | TDD-8 | JBTPR-8 | BTPR-8 | JSD-8 |
|----------|--------|-------|---------|--------|-------|
| <b>1</b> | 0.504  | 2.590 | 3.078   | 2.405  | 5.492 |
| <b>2</b> | 0.804  | 2.329 | 3.435   | 2.982  | 5.837 |
| <b>3</b> | 0.544  | 2.367 | 2.974   | 2.454  | 5.296 |
| <b>4</b> | 0.458  | 2.227 | 2.892   | 2.454  | 5.317 |
| <b>5</b> | 0.510  | 2.377 | 2.957   | 2.450  | 5.384 |
| <b>6</b> | 1.060  | 2.160 | 3.574   | 3.142  | 5.868 |

\* SAPR-8: square antiprism ( $D_{4d}$ ); TDD-8: triangular dodecahedron ( $D_{2d}$ ); JBTPR-8: Biaugmented trigonal prism J50 ( $C_{2v}$ ); BTPR-8: biaugmented trigonal prism ( $C_{2v}$ ); JSD-8: Snub diphenooid J84 ( $D_{2d}$ ).

\*Shape measures relative to other reference polyhedron are significantly larger.

**Table S.4-** Shape measures for Zn(II) coordination environments in complexes **1-6**.

| Complex      | PP-5   | vOC-5 | TBPY-5 | SPY-5 | JTBPY-5 |
|--------------|--------|-------|--------|-------|---------|
| <b>1-Zn1</b> | 32.663 | 3.344 | 4.331  | 0.572 | 7.493   |
| <b>1-Zn2</b> | 32.571 | 3.700 | 4.595  | 0.687 | 8.146   |
| <b>2-Zn1</b> | 33.426 | 4.677 | 3.833  | 1.223 | 7.206   |
| <b>2-Zn2</b> | 33.651 | 4.559 | 4.166  | 1.118 | 7.675   |
| <b>3-Zn1</b> | 32.887 | 4.792 | 4.126  | 1.242 | 8.049   |
| <b>3-Zn2</b> | 33.765 | 4.569 | 4.677  | 1.017 | 8.041   |
| <b>4-Zn1</b> | 33.807 | 5.574 | 4.321  | 1.714 | 8.478   |
| <b>4-Zn2</b> | 33.941 | 5.627 | 4.732  | 1.662 | 8.603   |
| <b>5-Zn1</b> | 34.333 | 5.532 | 4.383  | 1.650 | 8.560   |
| <b>5-Zn2</b> | 34.123 | 5.478 | 5.135  | 1.504 | 8.914   |
| <b>6-Zn1</b> | 31.976 | 2.884 | 3.369  | 0.696 | 5.913   |
| <b>6-Zn2</b> | 31.454 | 2.979 | 3.609  | 0.730 | 6.058   |

\*PP-5: pentagon ( $D_{5h}$ ); vOC-5: vacant octahedron ( $C_{4v}$ ); TBPY-5: trigonal bipyramid ( $D_{3h}$ ); SPY-5: square pyramid ( $C_{4v}$ ); JTBPY-5: Johnson trigonal bipyramid ( $D_{3h}$ ).

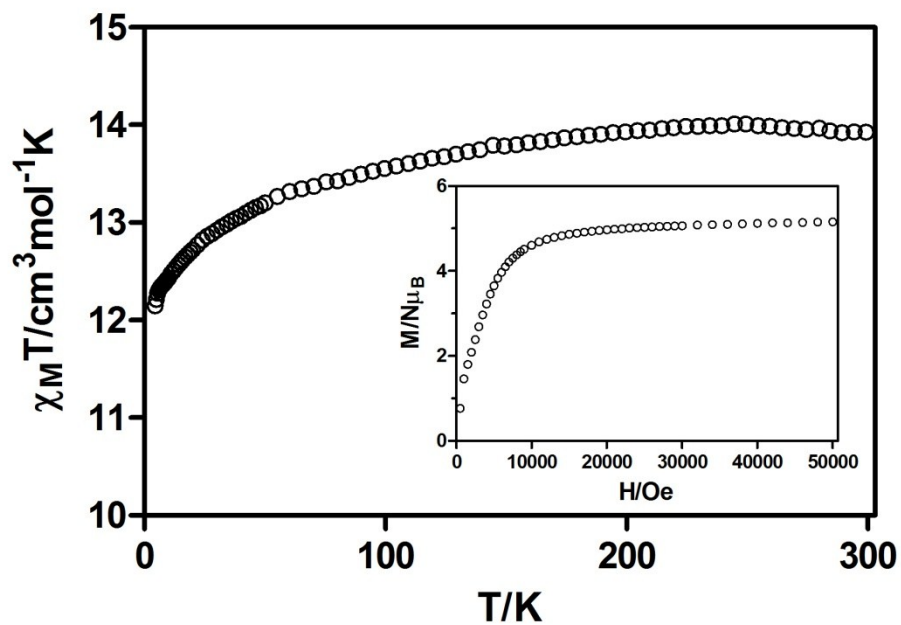

**Figure S.1.-** Temperature dependence of  $\chi_M T$  for **1**. Inset: Field dependence of the molar magnetization for **1**.

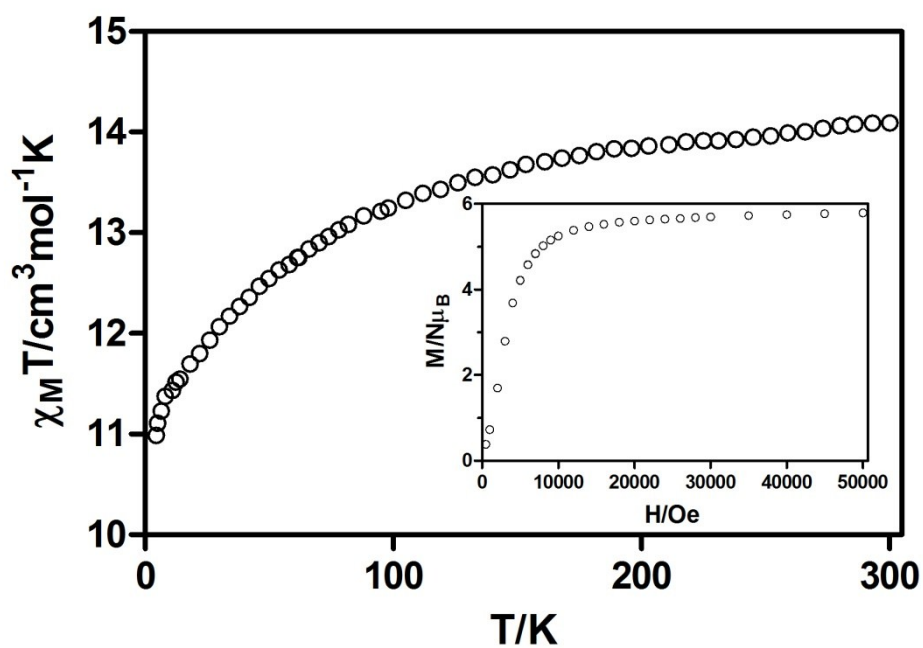

**Figure S.2.-** Temperature dependence of  $\chi_M T$  for **2**. Inset: Field dependence of the molar magnetization for **2**.

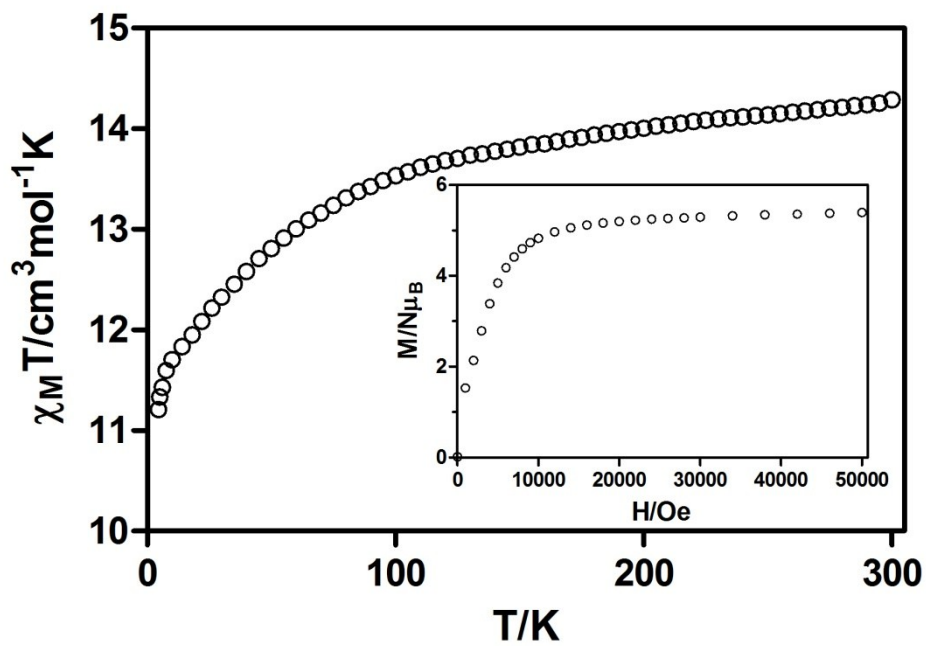

**Figure S.3.-** Temperature dependence of  $\chi_M T$  for **3**. Inset: Field dependence of the molar magnetization for **3**.

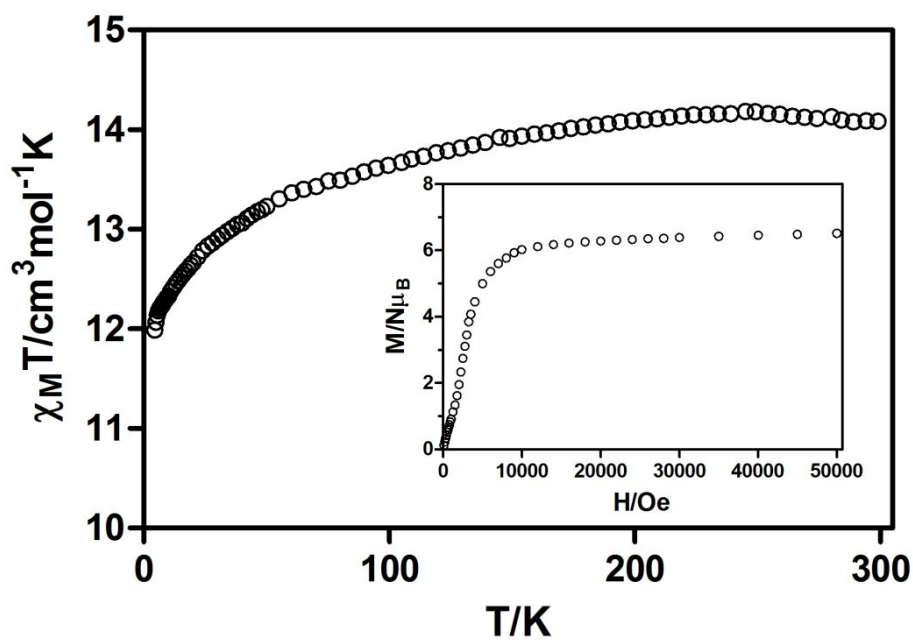

**Figure S.4.-** Temperature dependence of  $\chi_M T$  for **4**. Inset: Field dependence of the molar magnetization for **4**.

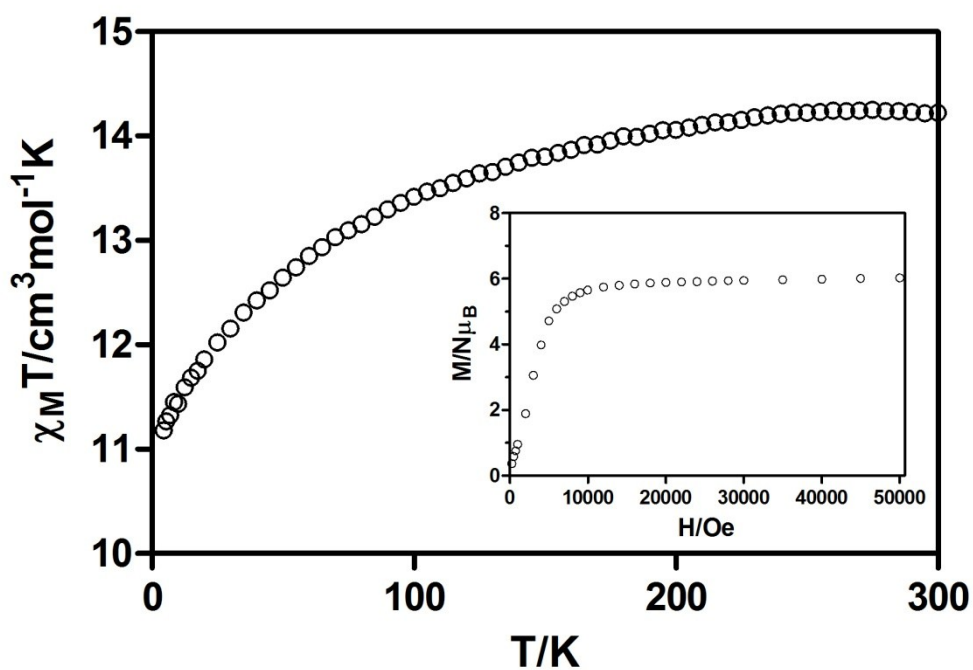

**Figure S.5.-** Temperature dependence of  $\chi_M T$  for **5**. Inset: Field dependence of the molar magnetization for **5**.

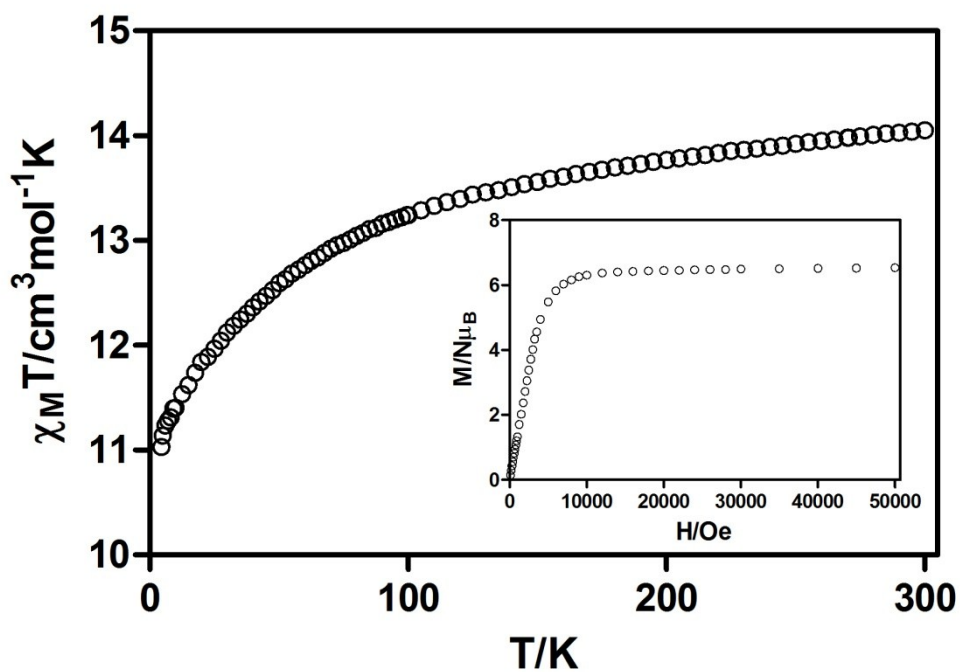

**Figure S.6.-** Temperature dependence of  $\chi_M T$  for **6**. Inset: Field dependence of the molar magnetization for **6**.



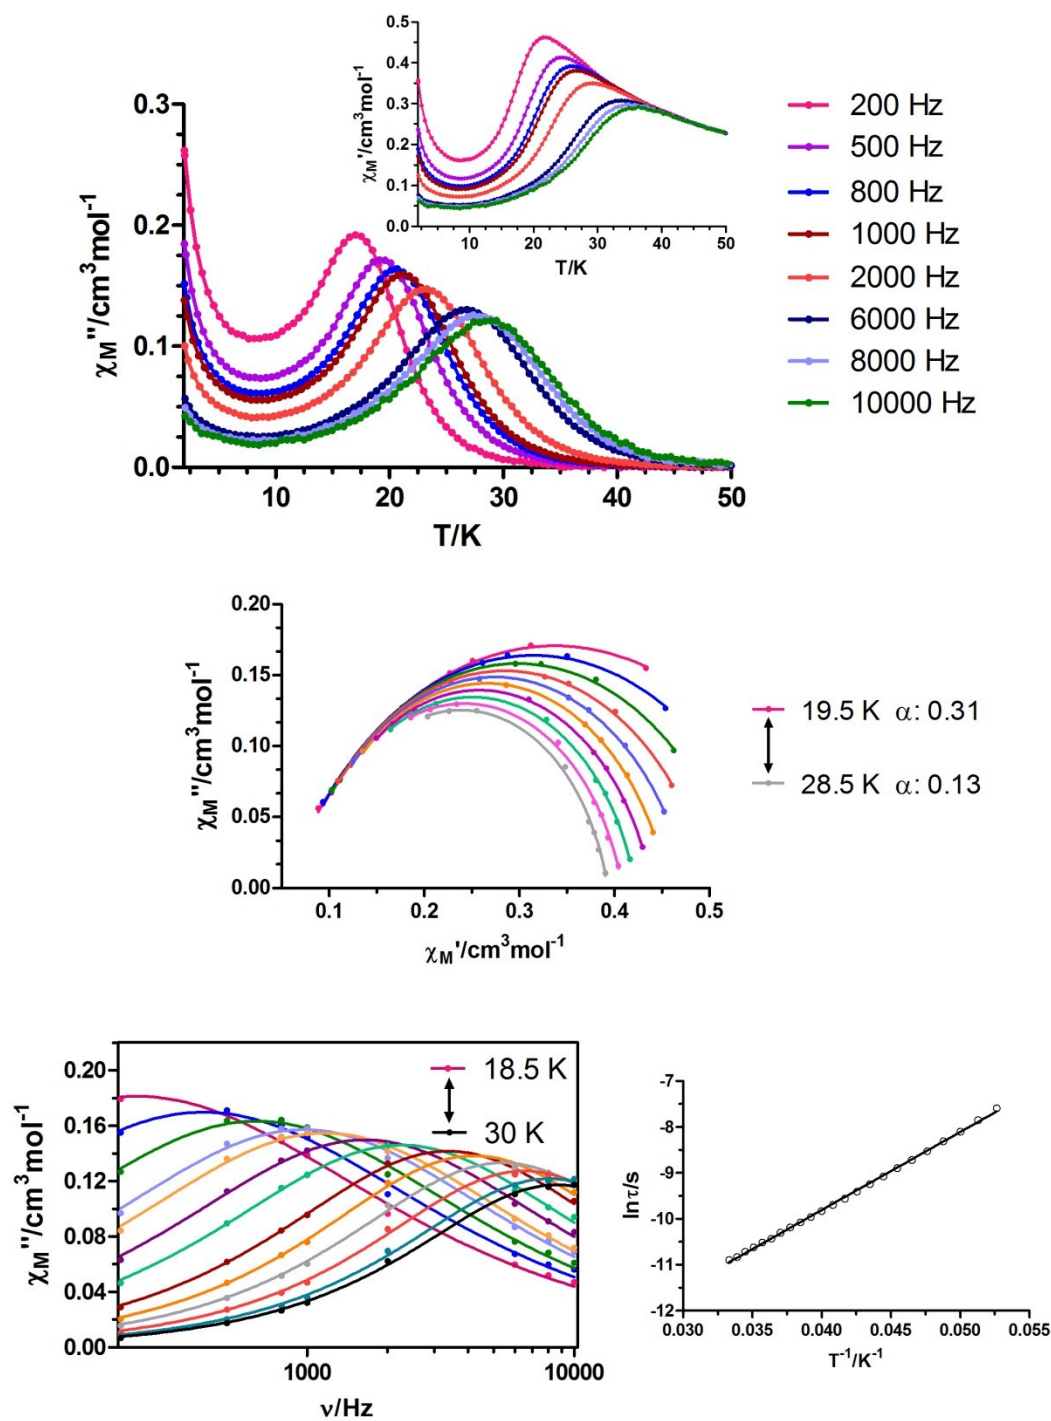

**Figure S.7.-** Top: temperature dependence of in-phase  $\chi_M'$  (inset) and out-of phase  $\chi_M''$  components of the *alternating current* susceptibility for complex **1** under zero applied external field. Medium: Cole-Cole plot. Bottom left: variable-temperature frequency dependence of the  $\chi_M''$  signal. Bottom right: Arrhenius plots for the relaxation of **1** (black line).

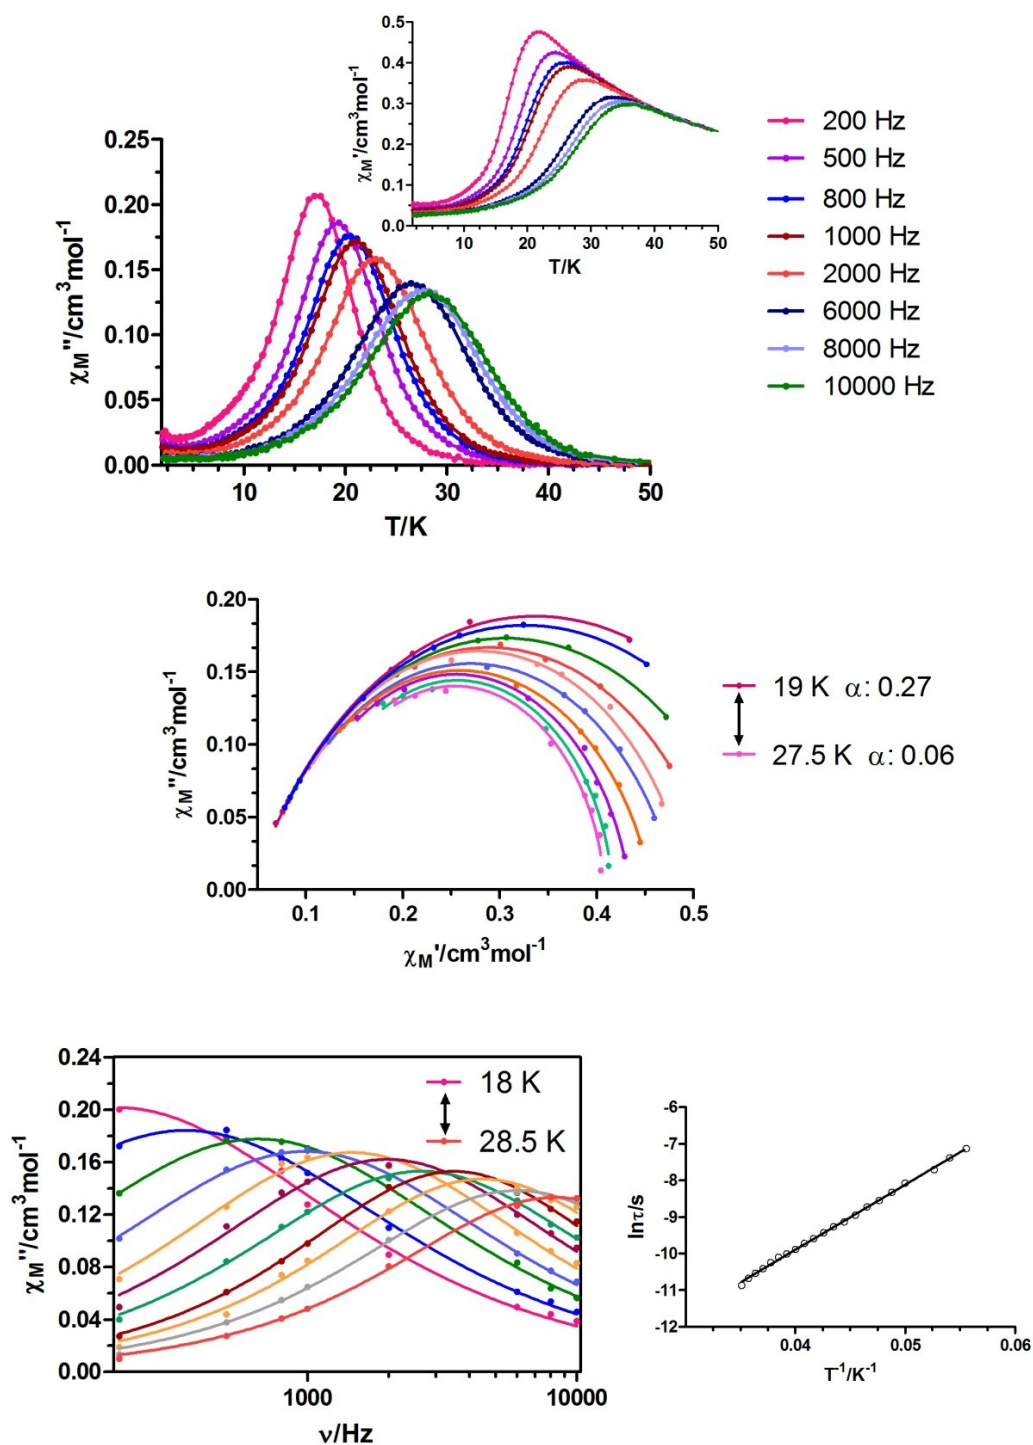

**Figure S.8.-** Top: temperature dependence of in-phase  $\chi_M'$  (inset) and out-of phase  $\chi_M''$  components of the *alternating current* susceptibility for complex **1** under 1000 Oe applied external field. Medium: Cole-Cole plot. Bottom left: variable-temperature frequency dependence of the  $\chi_M''$  signal. Bottom right: Arrhenius plots for the relaxation of **1** (black line).

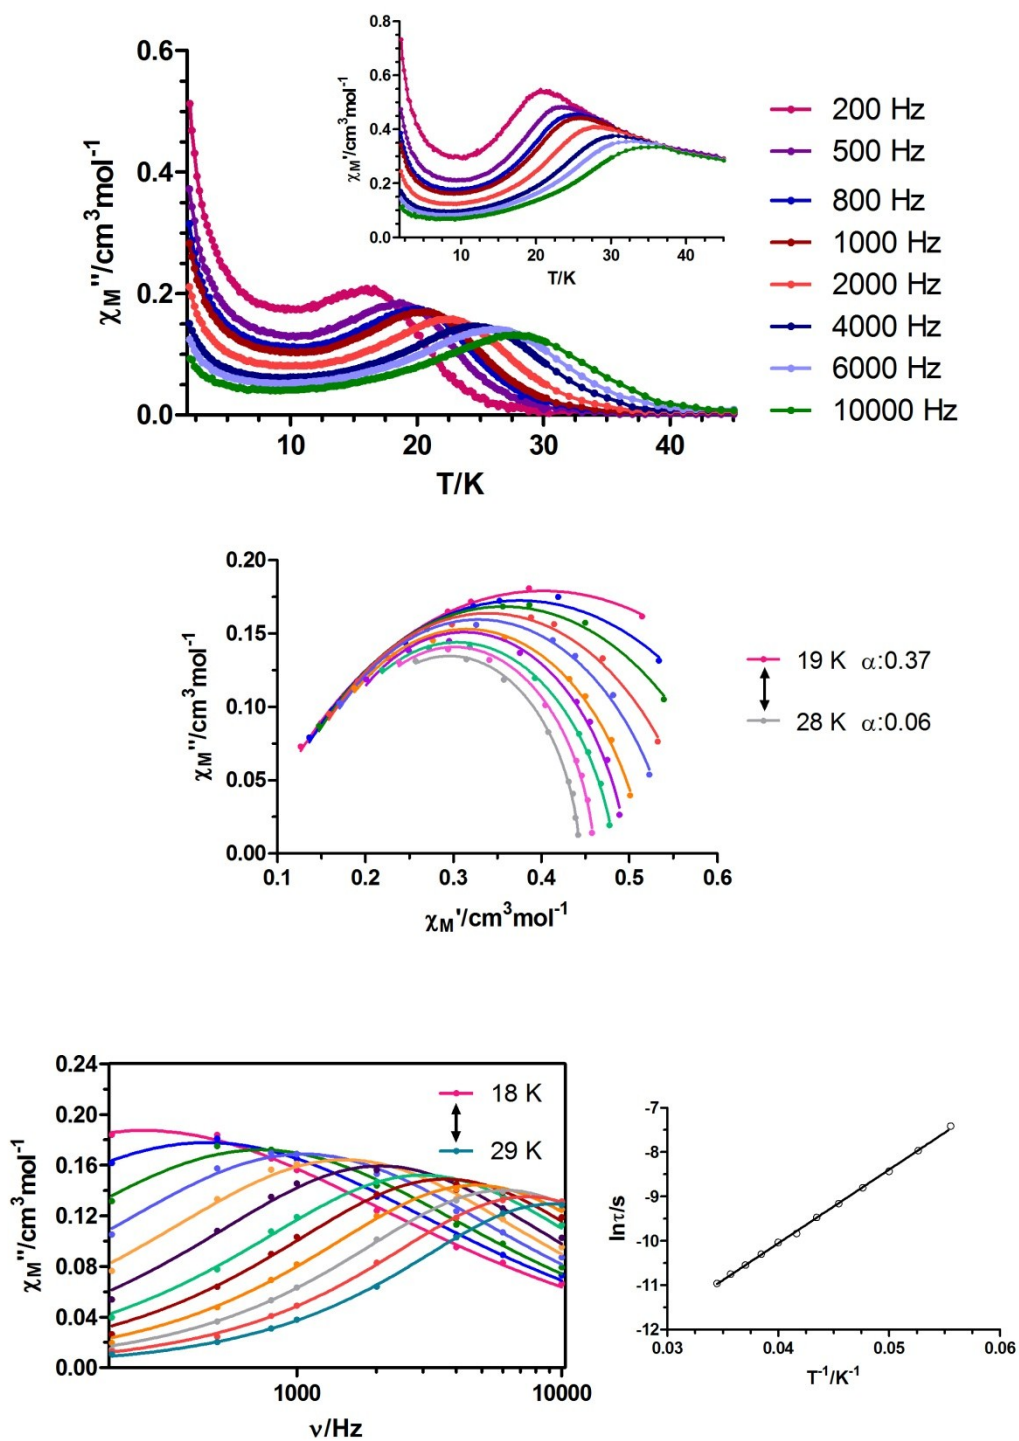

**Figure S.9.-** Top: temperature dependence of in-phase  $\chi_M'$  (inset) and out-of phase  $\chi_M''$  components of the *alternating current* susceptibility for complex 2 under zero applied external field. Medium: Cole-Cole plot. Bottom left: variable-temperature frequency dependence of the  $\chi_M''$  signal. Bottom right: Arrhenius plots for the relaxation of 2 (black line).

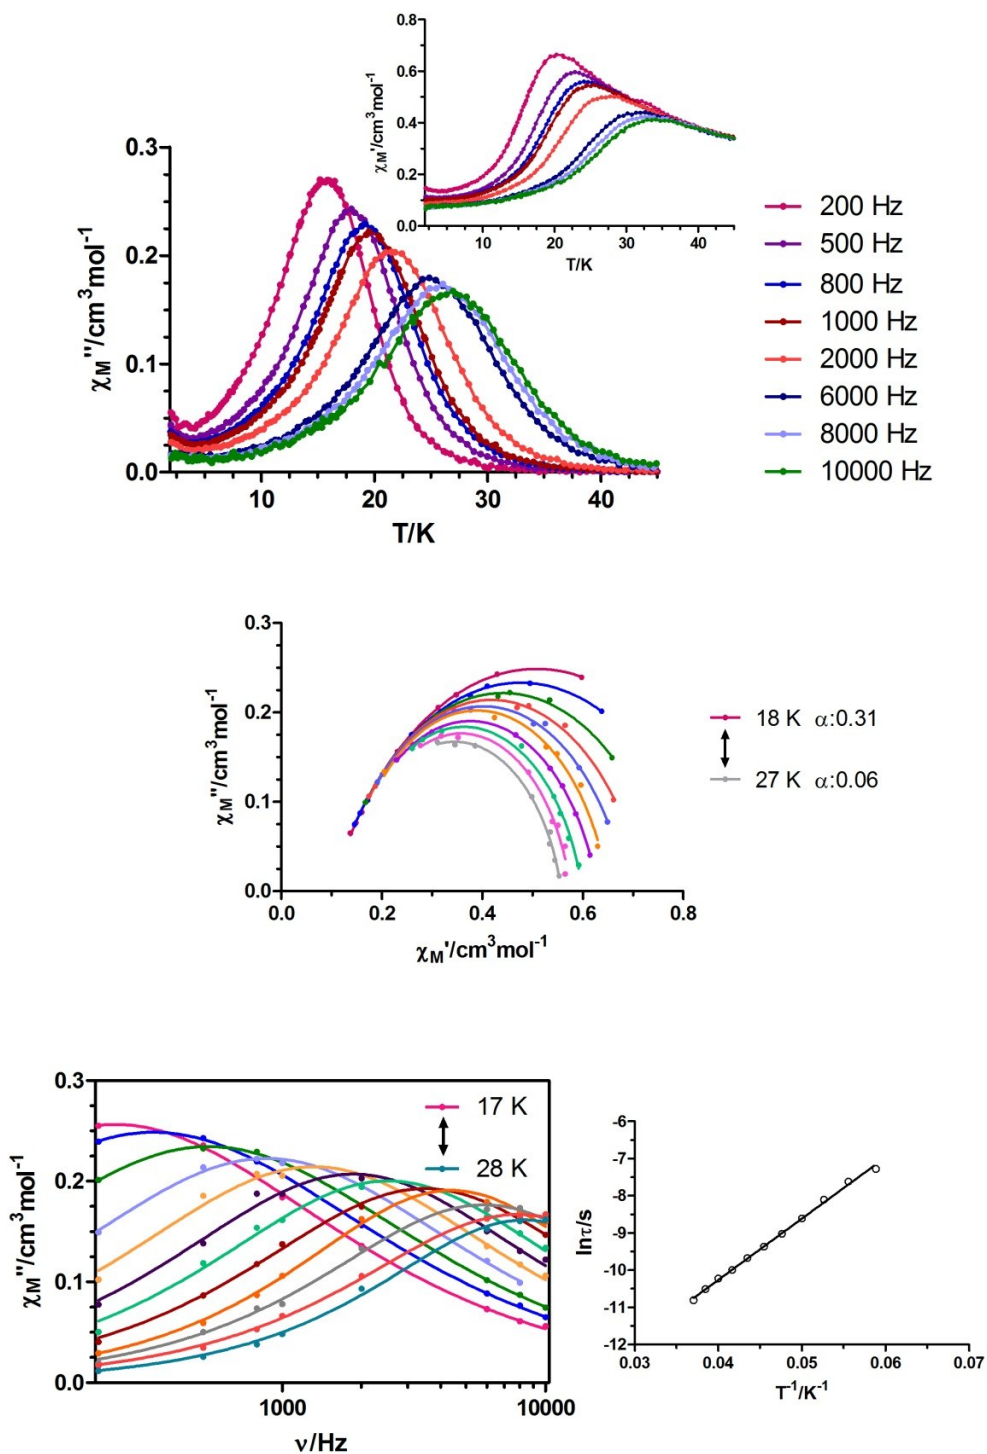

**Figure S.10.-** Top: temperature dependence of in-phase  $\chi_M'$  (inset) and out-of phase  $\chi_M''$  components of the *alternating current* susceptibility for complex **2** under 1000 Oe applied external field. Medium: Cole-Cole plot. Bottom left: variable-temperature frequency dependence of the  $\chi_M''$  signal. Bottom right: Arrhenius plots for the relaxation of **2** (black line).

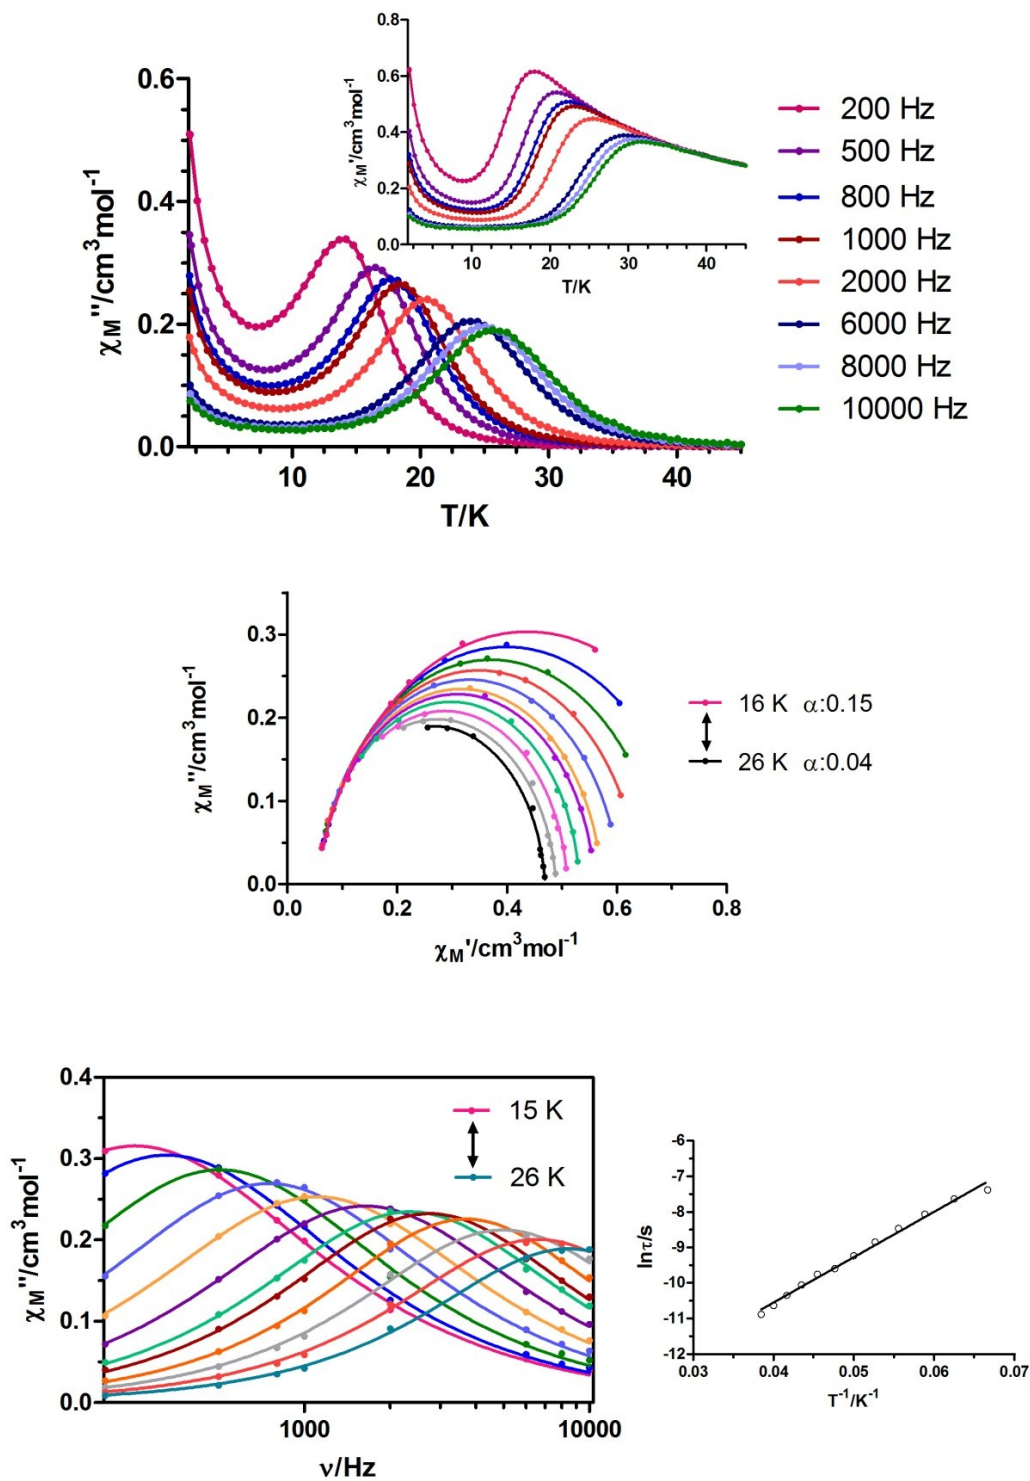

**Figure S.11.-** Top: temperature dependence of in-phase  $\chi_M'$  (inset) and out-of phase  $\chi_M''$  components of the *alternating current* susceptibility for complex **3** under zero applied external field. Medium: Cole-Cole plot. Bottom left: variable-temperature frequency dependence of the  $\chi_M''$  signal. Bottom right: Arrhenius plots for the relaxation of **3** (black line).

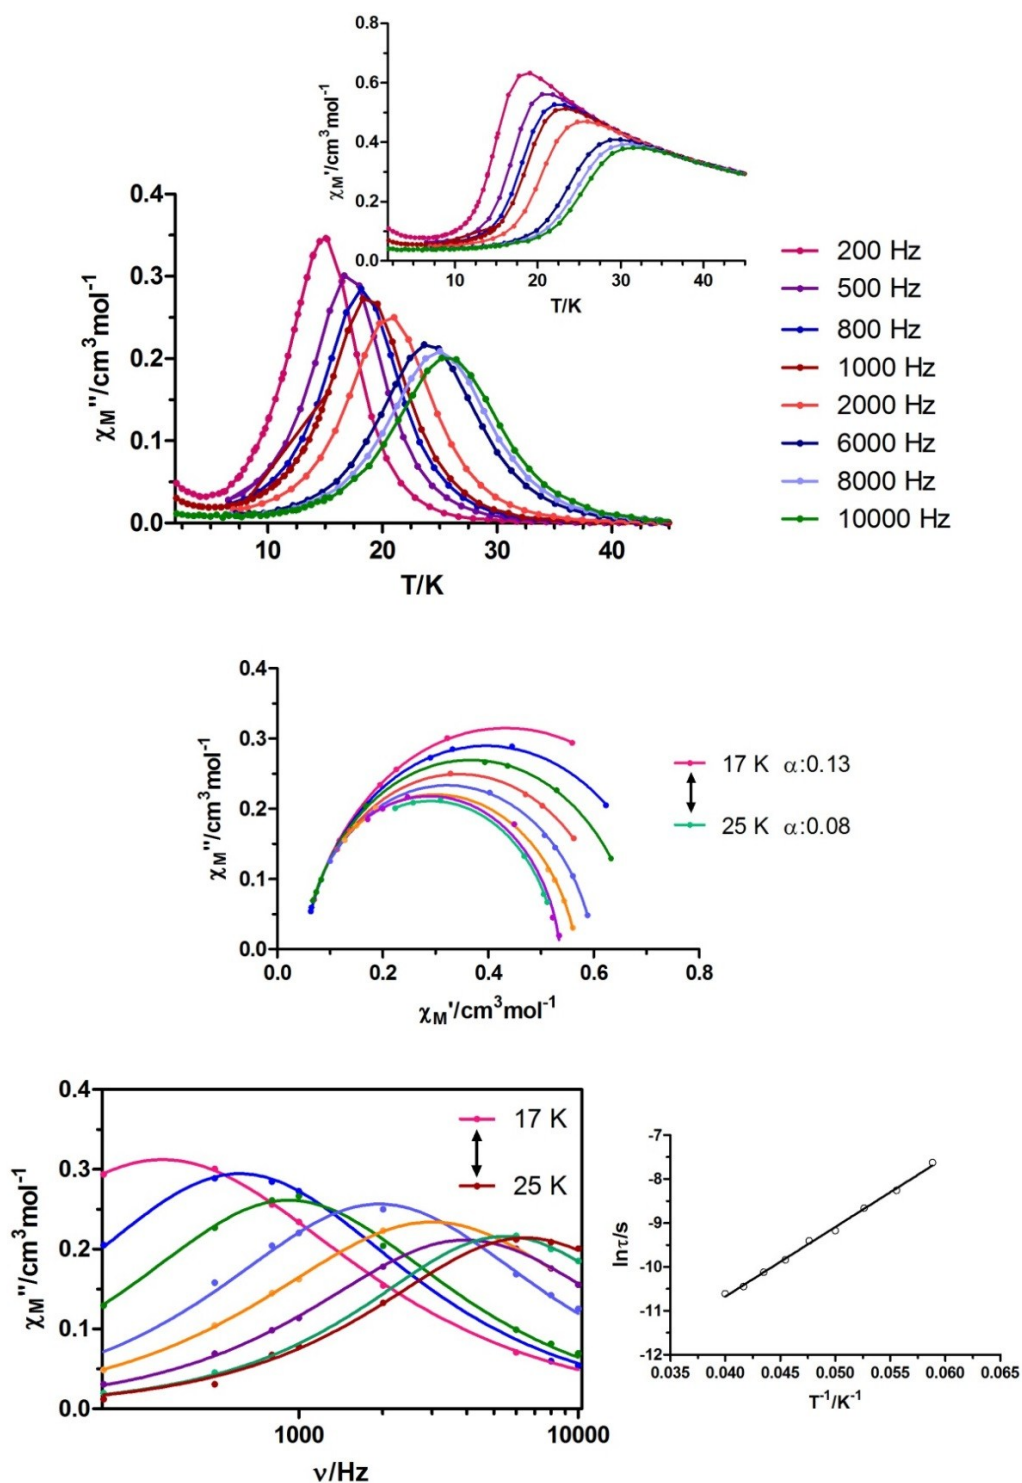

**Figure S.12.-** Top: temperature dependence of in-phase  $\chi_M'$  (inset) and out-of phase  $\chi_M''$  components of the *alternating current* susceptibility for complex **3** under 1000 Oe applied external field. Medium: Cole-Cole plot. Bottom left: variable-temperature frequency dependence of the  $\chi_M''$  signal. Bottom right: Arrhenius plots for the relaxation of **3** (black line).

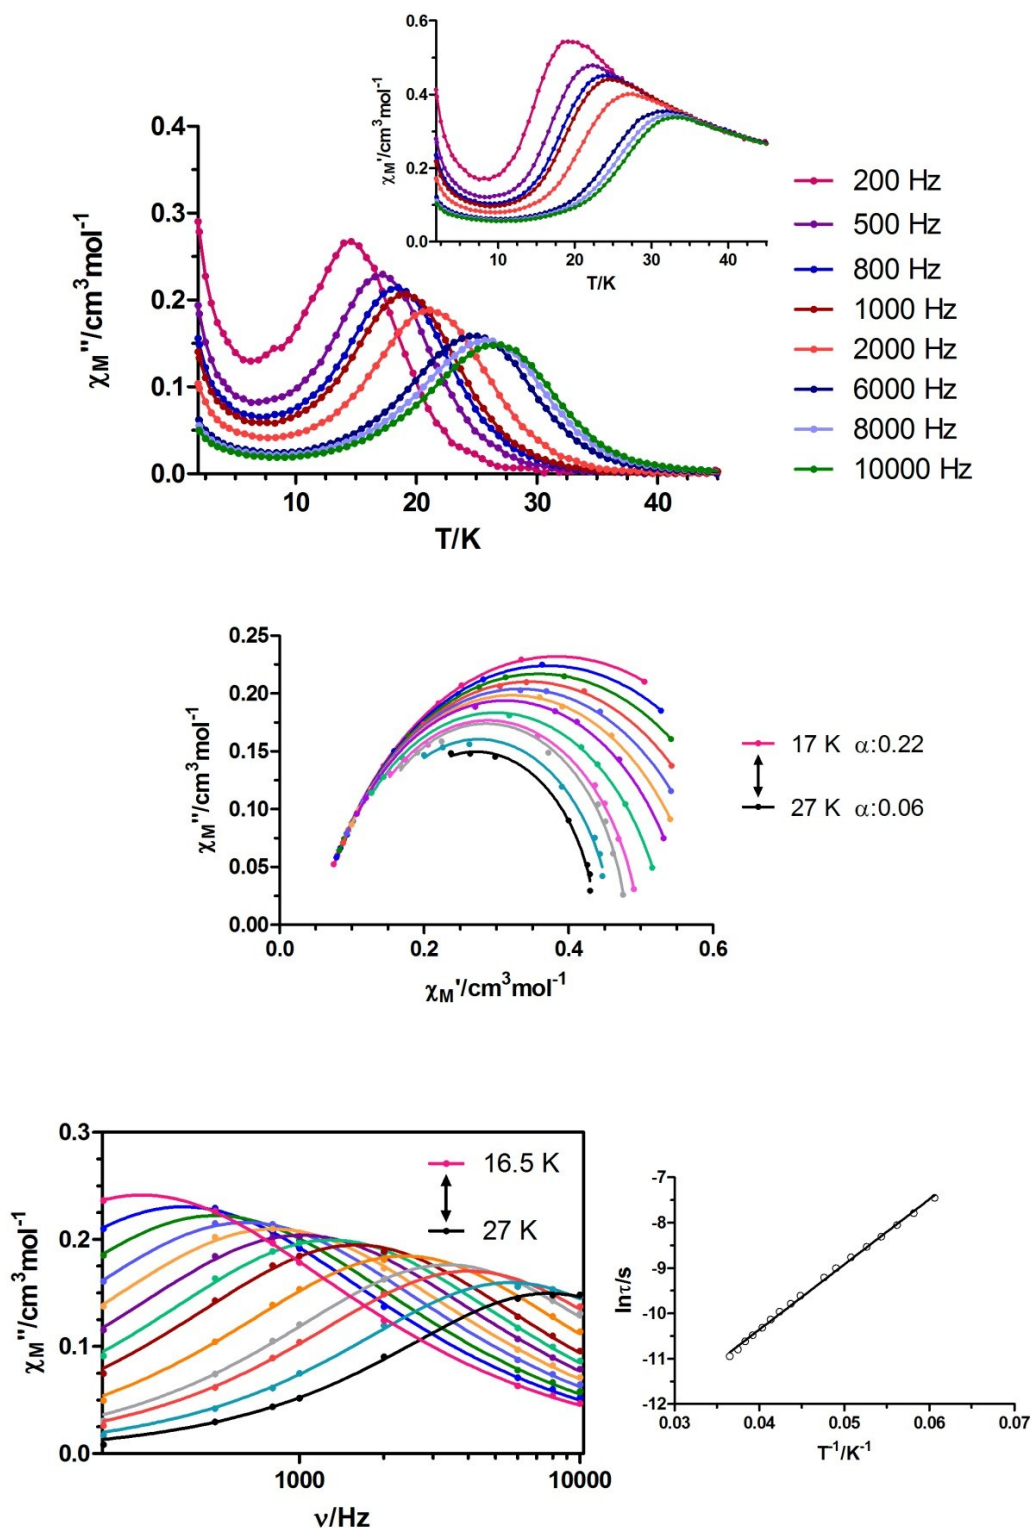

**Figure S.13.-** Top: temperature dependence of in-phase  $\chi_M'$  (inset) and out-of phase  $\chi_M''$  components of the *alternating current* susceptibility for complex **4** under zero applied external field. Medium: Cole-Cole plot. Bottom left: variable-temperature frequency dependence of the  $\chi_M''$  signal. Bottom right: Arrhenius plots for the relaxation of **4** (black line).

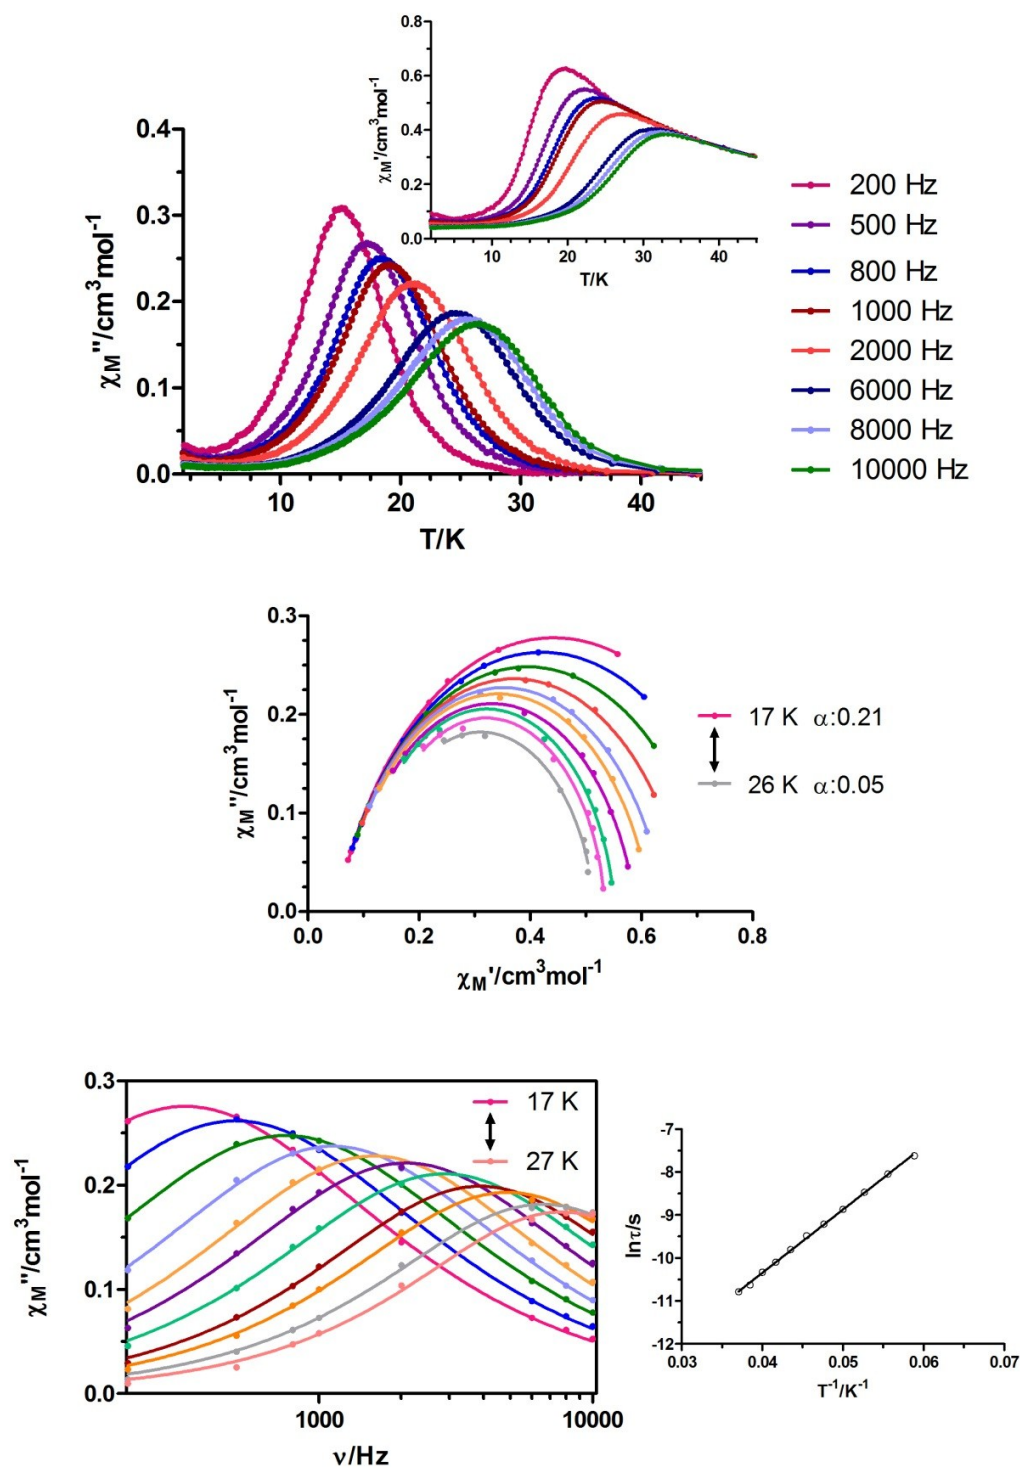

**Figure S.14.-** Top: temperature dependence of in-phase  $\chi_M'$  (inset) and out-of phase  $\chi_M''$  components of the *alternating current* susceptibility for complex 4 under 1000 Oe applied external field. Medium: Cole-Cole plot. Bottom left: variable-temperature frequency dependence of the  $\chi_M''$  signal. Bottom right: Arrhenius plots for the relaxation of 4 (black line).



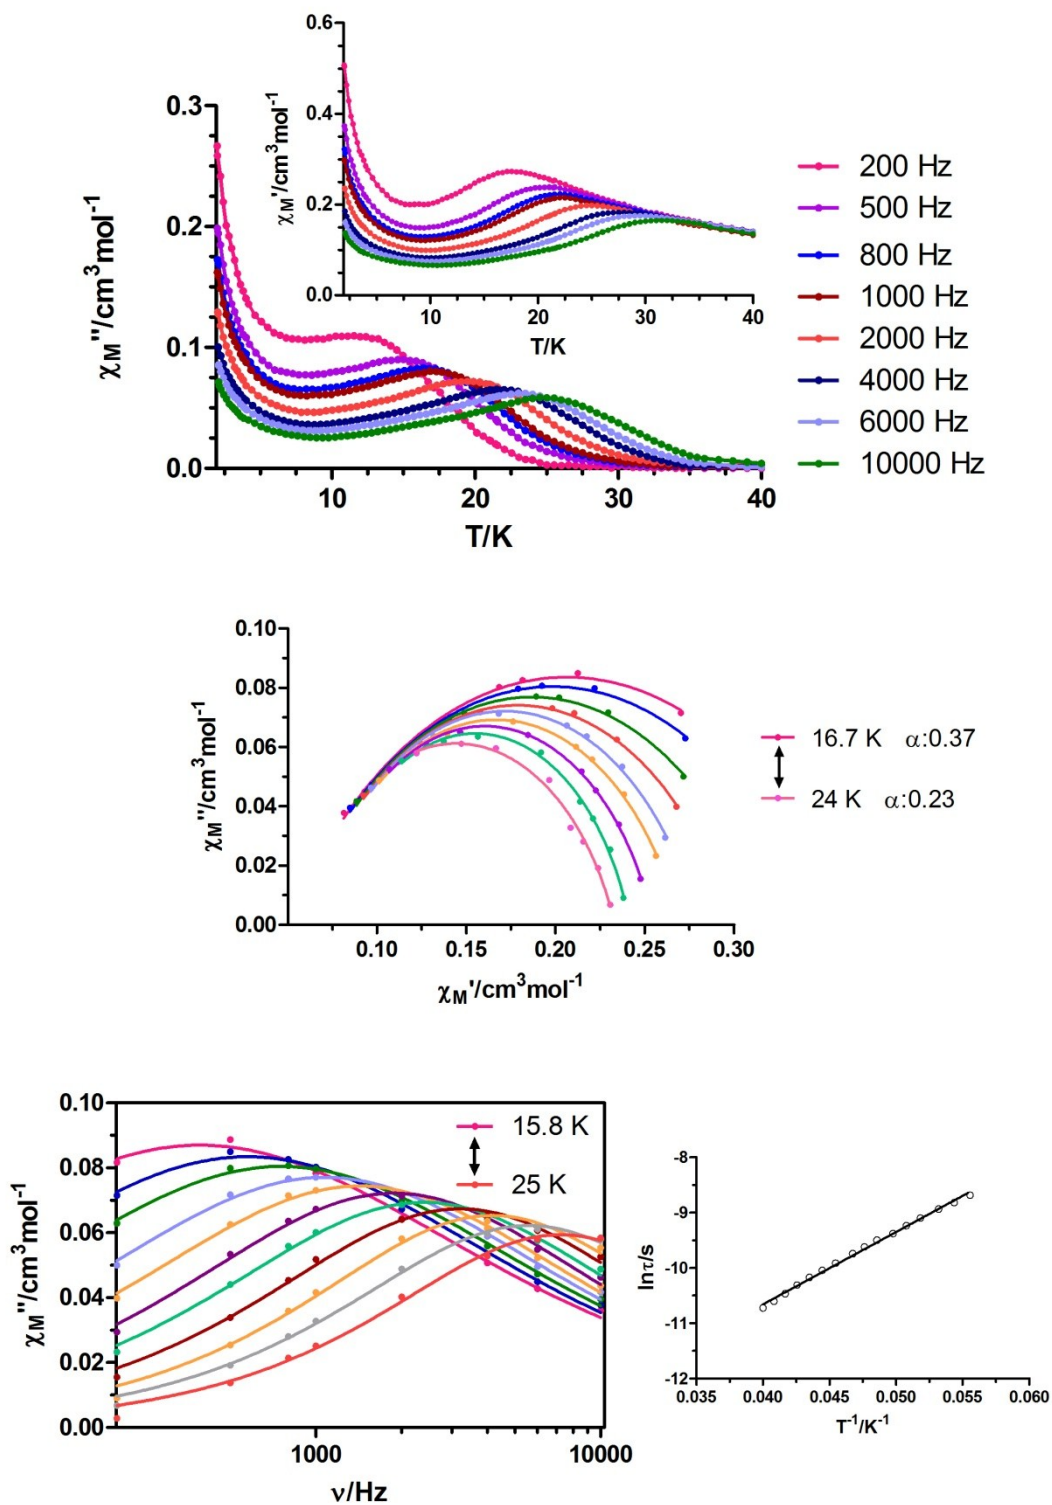

**Figure S.15.-** Top: temperature dependence of in-phase  $\chi_M'$  (inset) and out-of phase  $\chi_M''$  components of the *alternating current* susceptibility for complex **5** under zero applied external field. Medium: Cole-Cole plot. Bottom left: variable-temperature frequency dependence of the  $\chi_M''$  signal. Bottom right: Arrhenius plots for the relaxation of **5** (black line).

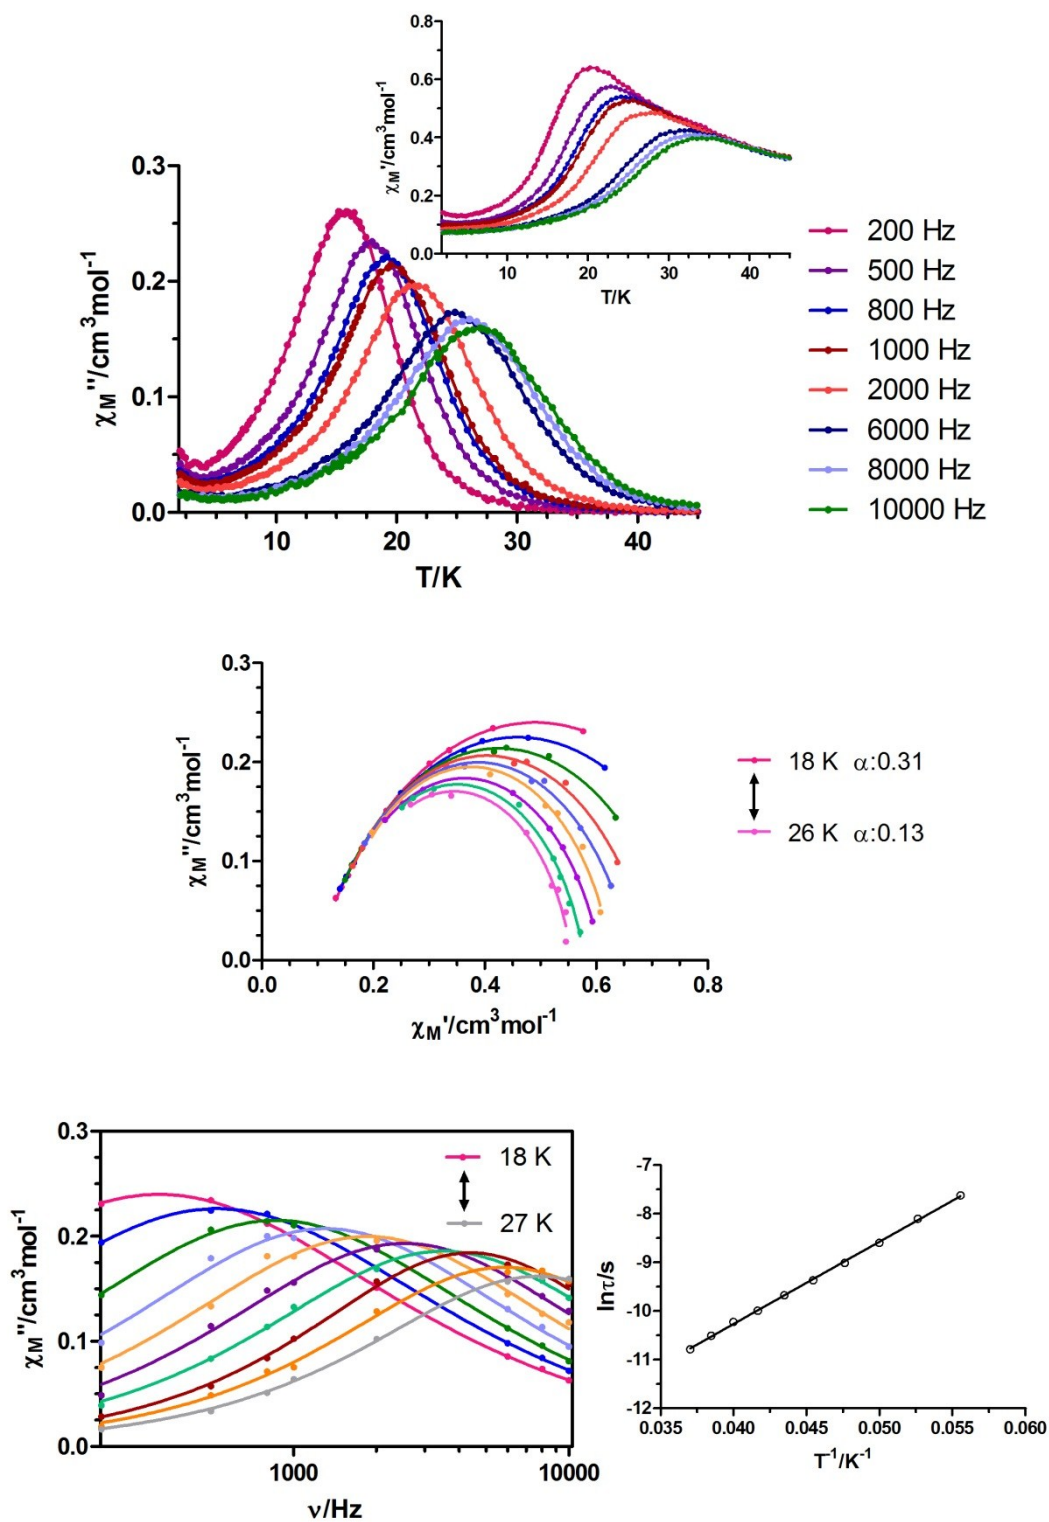

**Figure S.16.-** Top: temperature dependence of in-phase  $\chi_M'$  (inset) and out-of phase  $\chi_M''$  components of the *alternating current* susceptibility for complex **5** under 1000 Oe applied external field. Medium: Cole-Cole plot. Bottom left: variable-temperature frequency dependence of the  $\chi_M''$  signal. Bottom right: Arrhenius plots for the relaxation of **5** (black line).

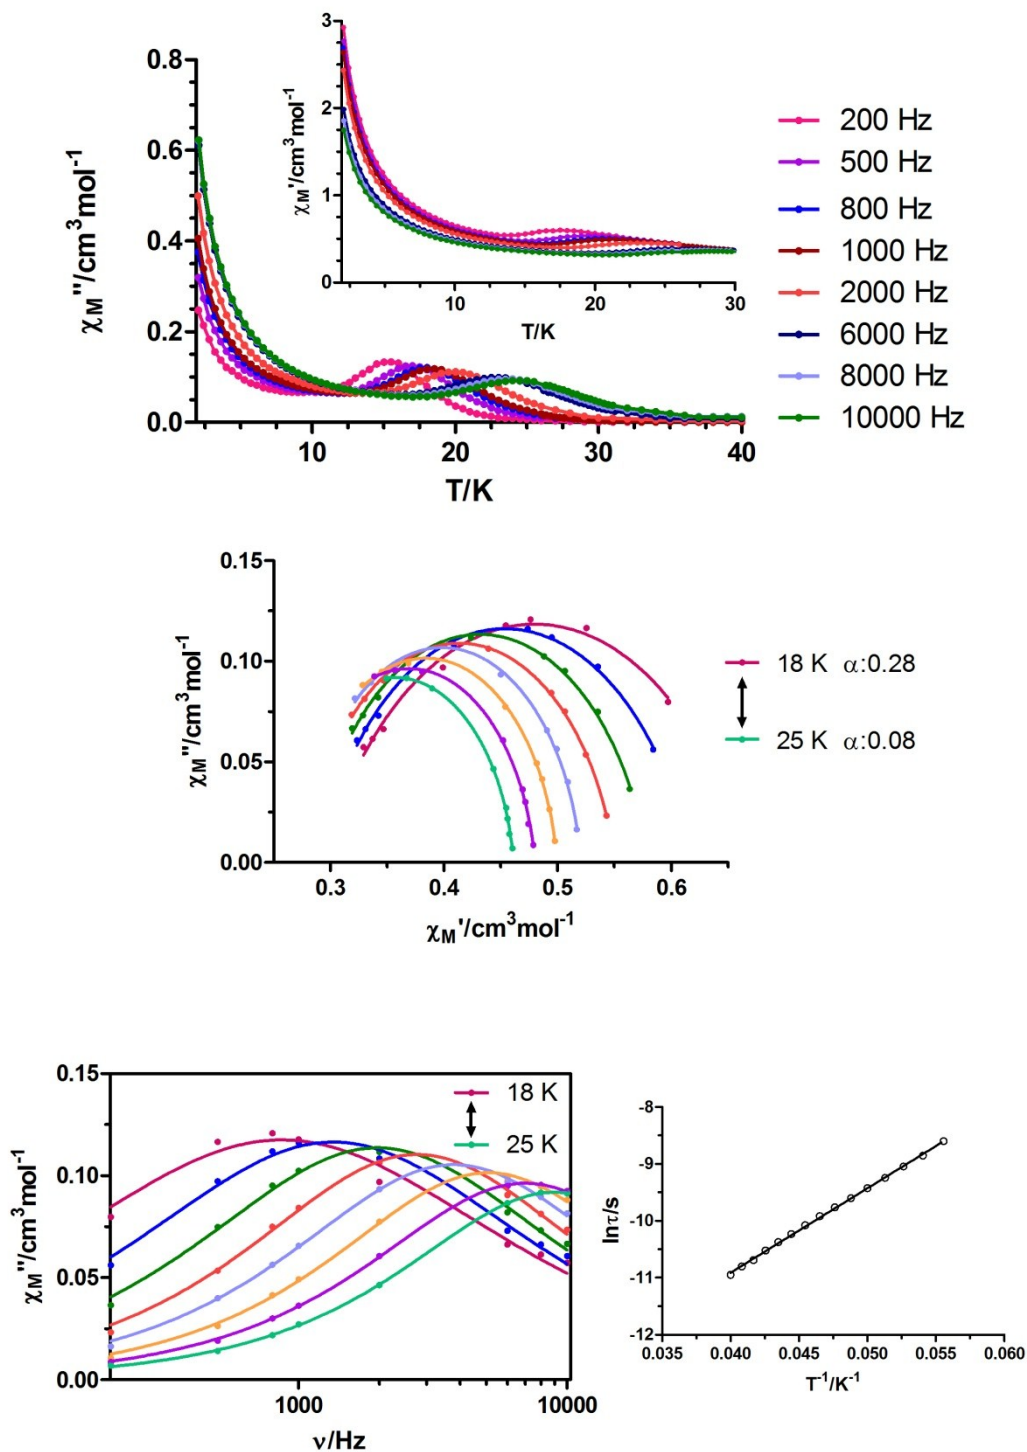

**Figure S.17.-** Top: temperature dependence of in-phase  $\chi_M'$  (inset) and out-of phase  $\chi_M''$  components of the *alternating current* susceptibility for complex **6** under zero applied external field. Medium: Cole-Cole plot. Bottom left: variable-temperature frequency dependence of the  $\chi_M''$  signal. Bottom right: Arrhenius plots for the relaxation of **6** (black line).

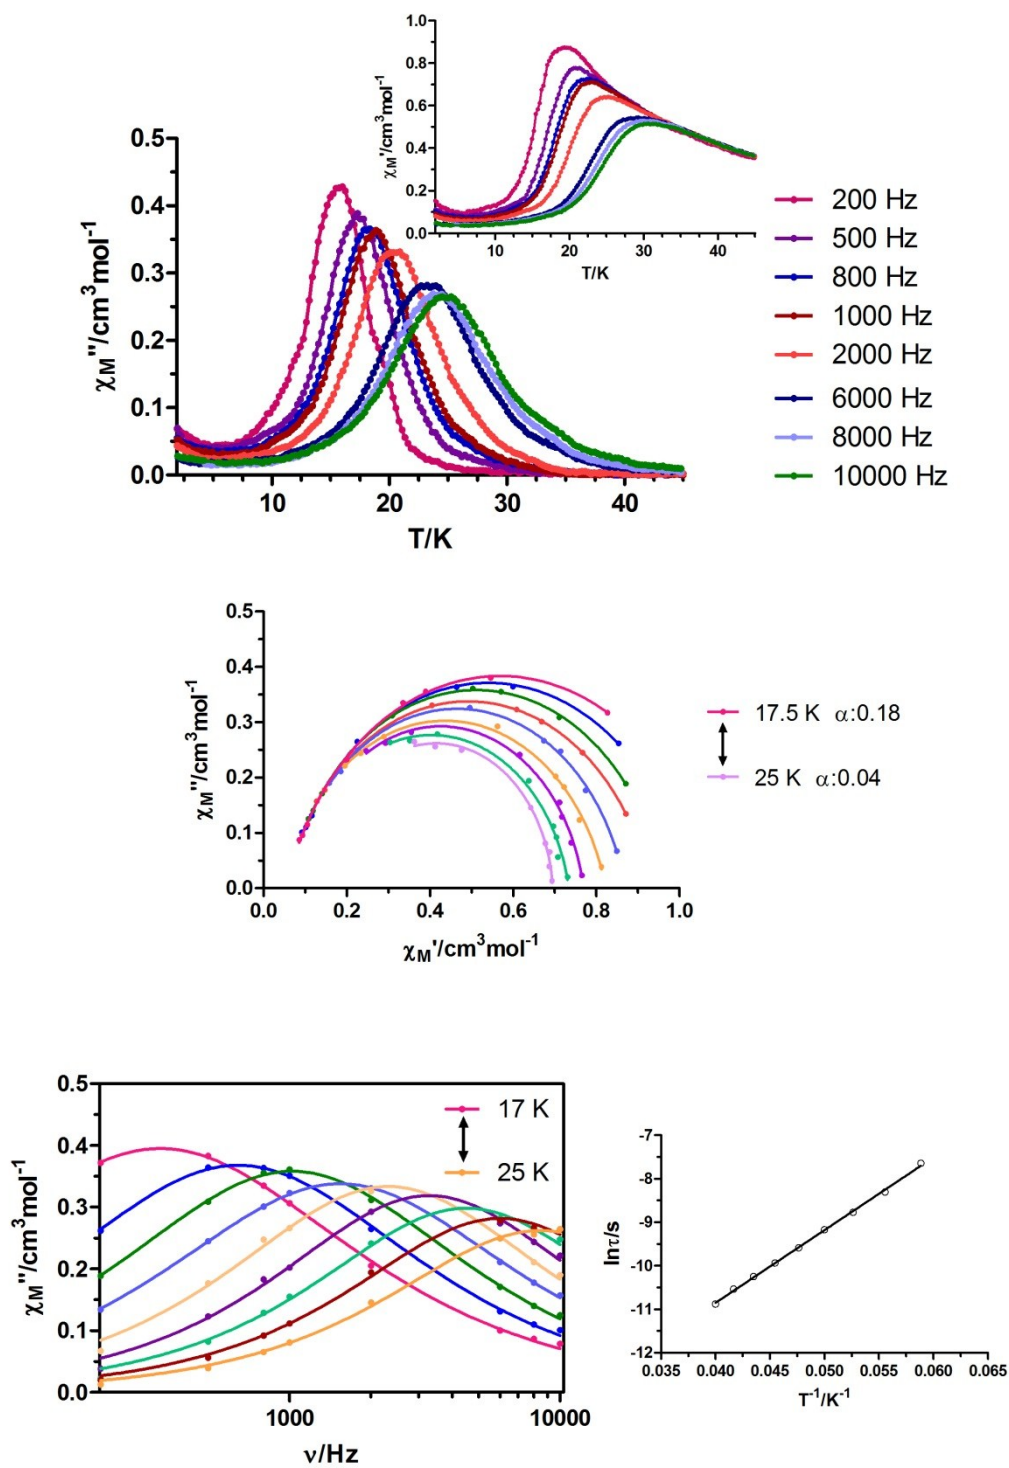

**Figure S.18.-** Top: temperature dependence of in-phase  $\chi_M'$  (inset) and out-of phase  $\chi_M''$  components of the *alternating current* susceptibility for complex **6** under 1000 Oe applied external field. Medium: Cole-Cole plot. Bottom left: variable-temperature frequency dependence of the  $\chi_M''$  signal. Bottom right: Arrhenius plots for the relaxation of **6** (black line).

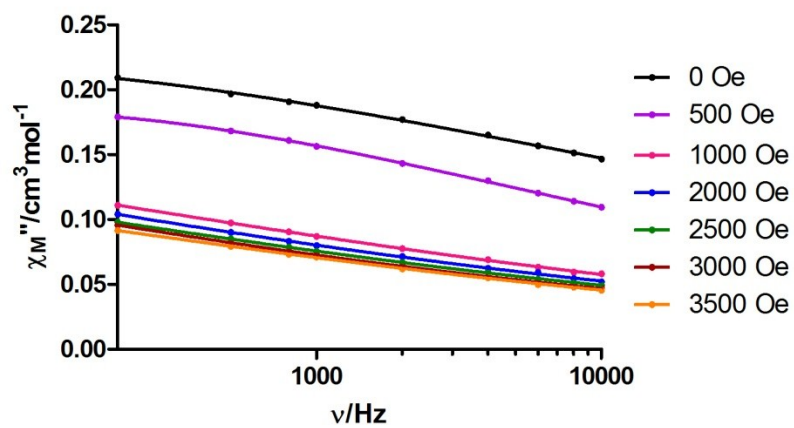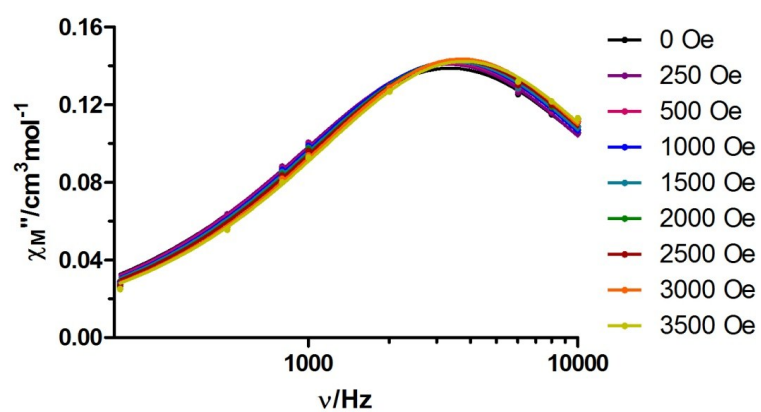

**Figure S.19.-** Field dependence of out-of-phase signals vs. frequency at 4 K (top) and 25 K (bottom) for **1**.

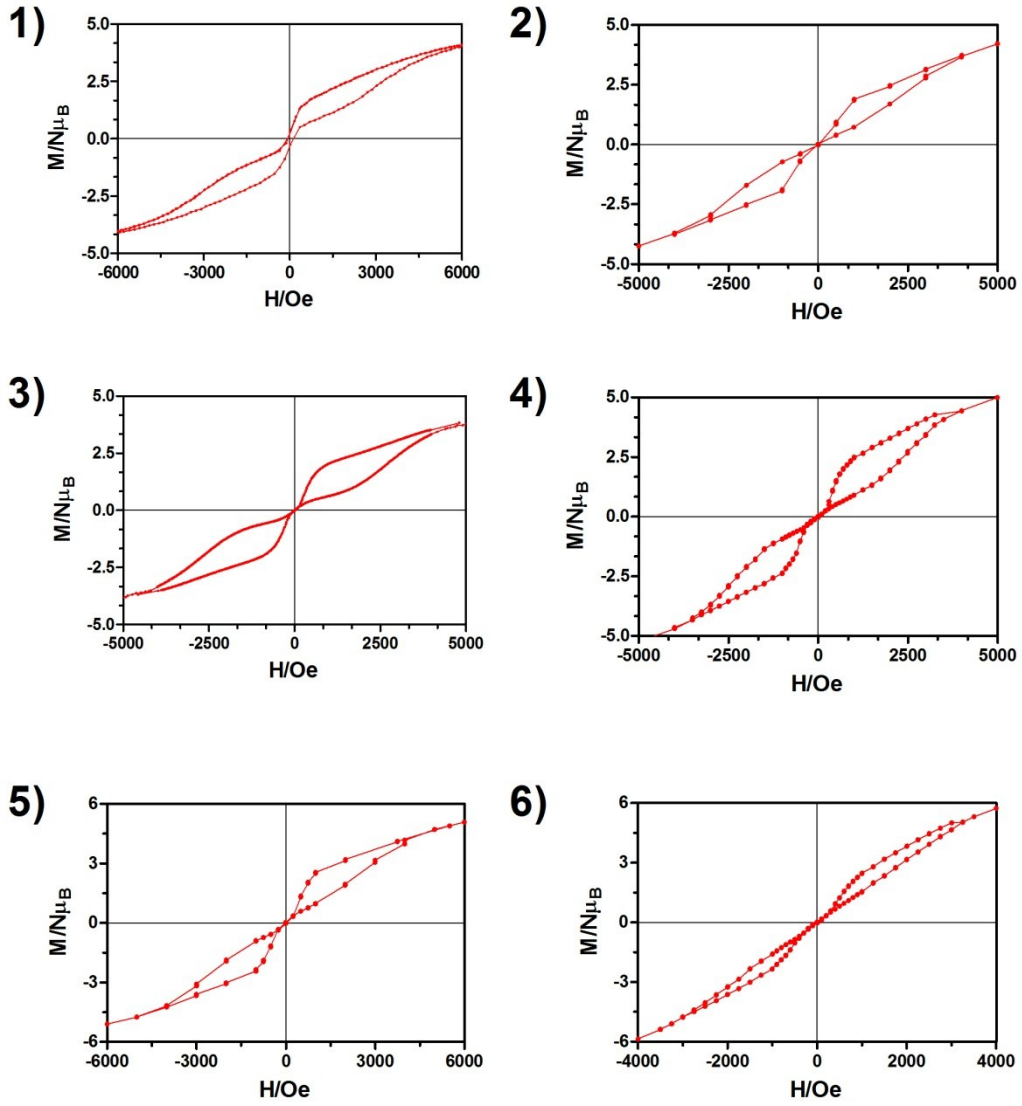

**Figure S.20.-** Magnetic Hysteresis loops for 1-6. Red solid lines represent a guide to the eye.

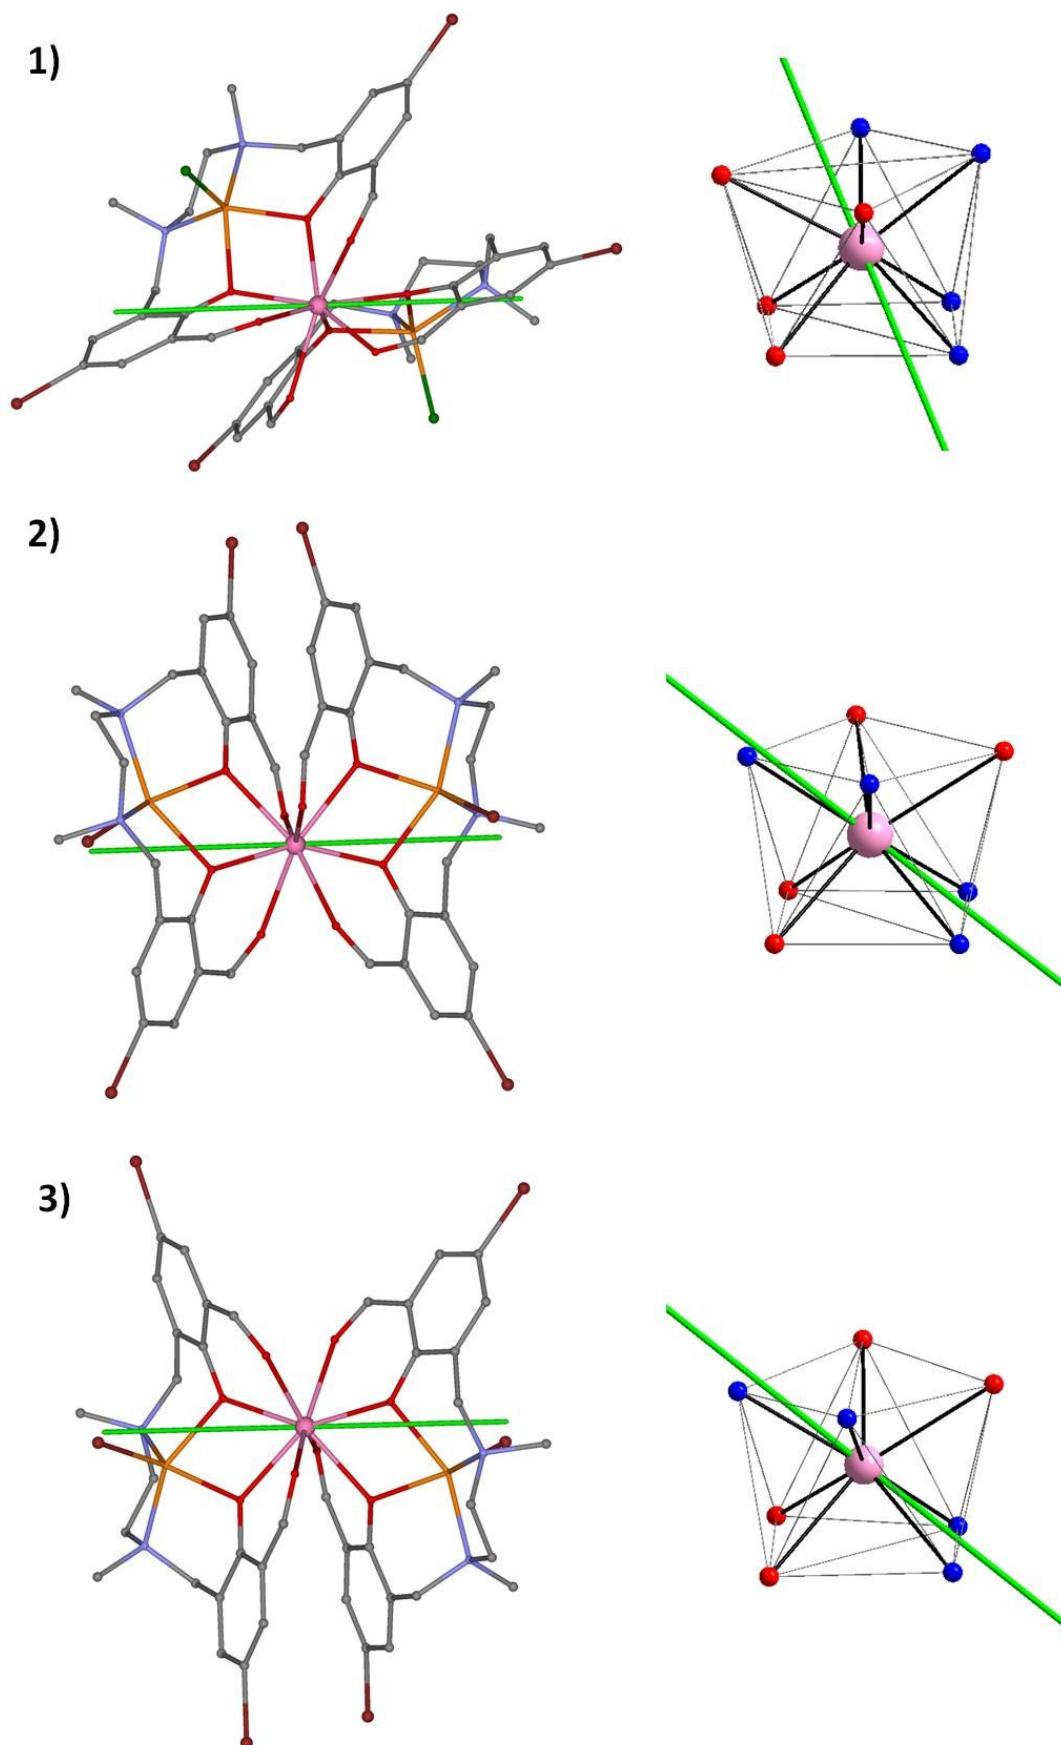

**Figure S.21.-** Anisotropy axis for the Dy(III) ion (green line) for **1-6** and  $[\text{ZnCl}(\mu\text{-L})\text{Dy}(\mu\text{-L})\text{ClZn}][\text{ZnCl}_3(\text{CH}_3\text{OH})]$ .

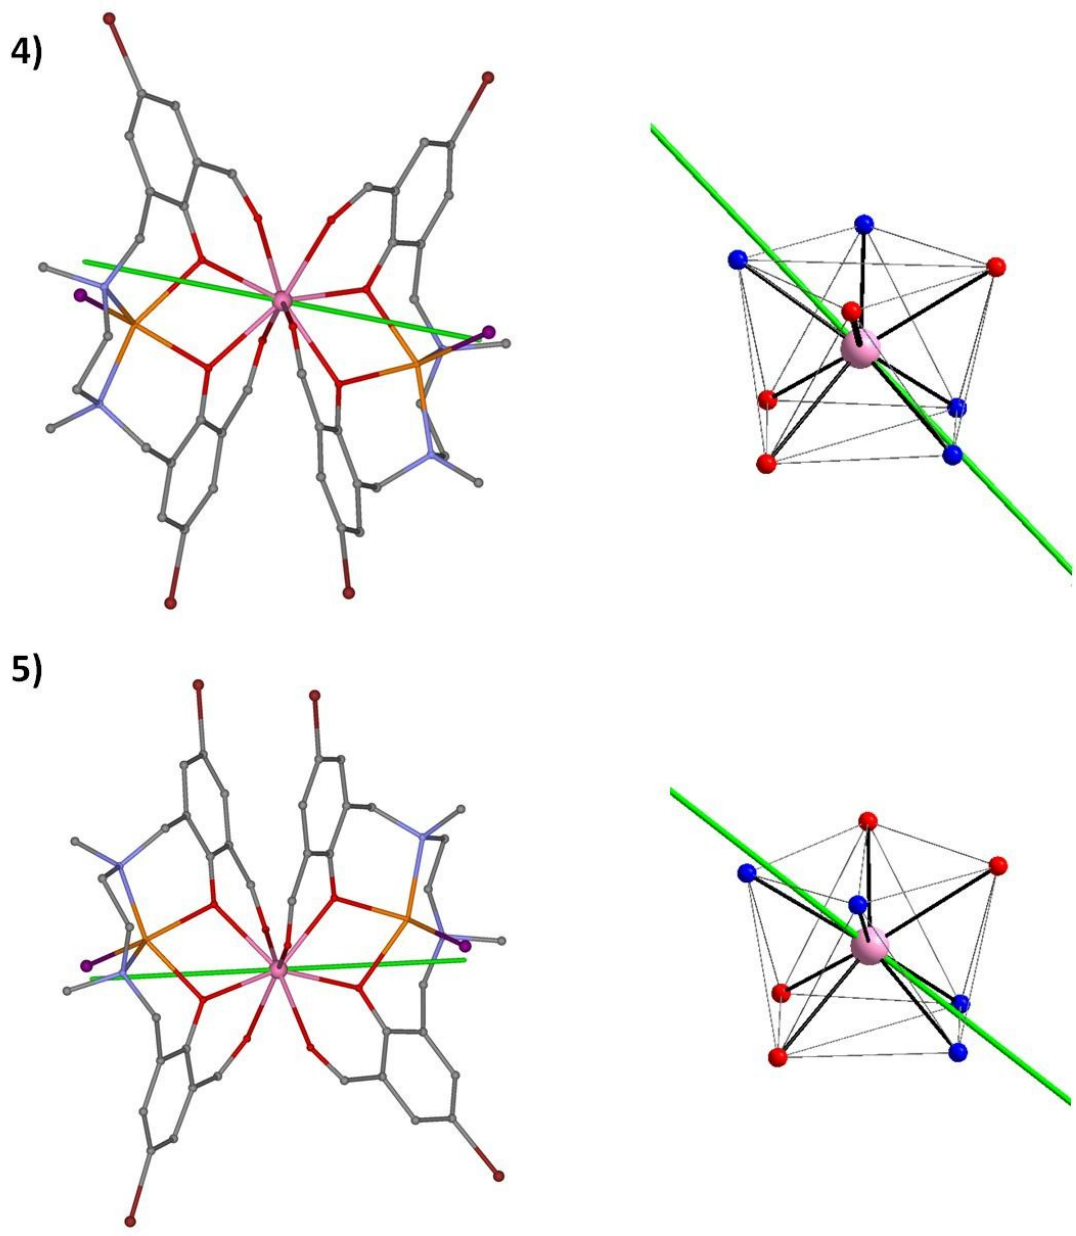

Figure S.21.- Continuation.



6)

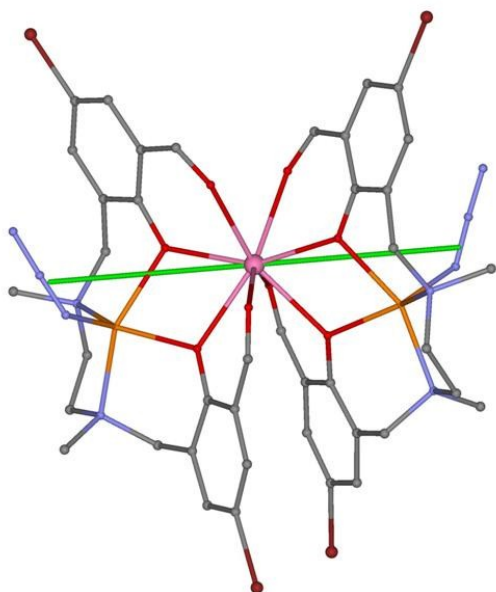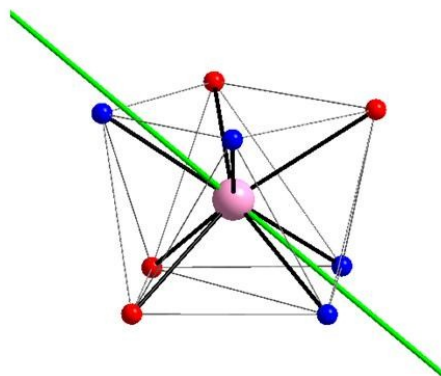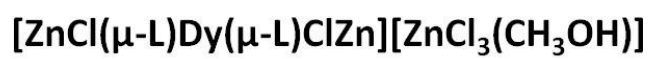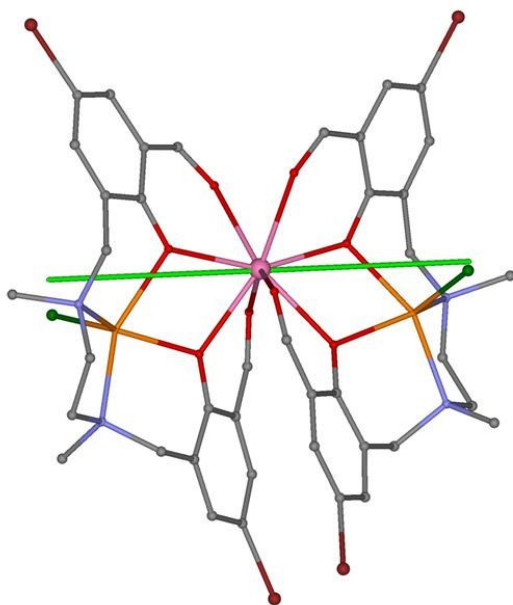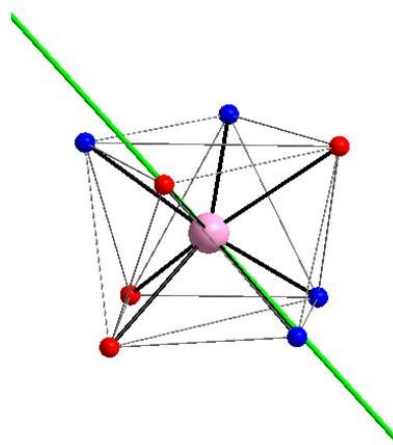

**Figure S.21.-** Continuation.

**Table S.5-** Summary of the Zn(II) and Dy(III) based SIMs.

|                                                                    | Complex                                                                                                           | Closest ideal geometry by SHAPE | CshM value                 | U <sub>eff</sub> (K)  | T <sub>B</sub> (K) Scan rate (Ts <sup>-1</sup> ) | Ref  |
|--------------------------------------------------------------------|-------------------------------------------------------------------------------------------------------------------|---------------------------------|----------------------------|-----------------------|--------------------------------------------------|------|
| ZnDy                                                               | [ZnDy(L1)(sal)Br(NO <sub>3</sub> )(MeOH)]                                                                         | MFF-9                           | 1.154                      | 333<br>94, 336 (1000) | -                                                | [1]  |
|                                                                    | [Zn(NO <sub>3</sub> )(L2)Dy(NO <sub>3</sub> ) <sub>2</sub> (H <sub>2</sub> O)]                                    | TCTPR-9                         | 2.530                      | 39.41 (900)           | -                                                | [2]  |
|                                                                    | [DyZn(L3)(OAc) <sub>2</sub> (NO <sub>3</sub> ) <sub>2</sub> ]·CH <sub>3</sub> OH                                  | MFF-9                           | 3.125                      | a (1000)              | -                                                | [3]  |
|                                                                    | [Zn(L4)(OAc)Dy(NO <sub>3</sub> ) <sub>2</sub> ]                                                                   | MFF-9 (Dy1)<br>CSAPR-9 (Dy2)    | 2.274<br>2.219             | 41 (1000)             | b                                                | [4]  |
|                                                                    | [Zn(L4)(9-An)Dy(NO <sub>3</sub> ) <sub>2</sub> ]·CH <sub>3</sub> CN                                               | MFF-9                           | 1.668                      | a<br>32.1 (1000)      | b                                                | [4]  |
|                                                                    | [ZnDy(NO <sub>3</sub> ) <sub>2</sub> (L5) <sub>2</sub> (OAc)]                                                     | CSAPR-9                         | 2.020                      | 119 (3500)            | -                                                | [5]  |
|                                                                    | [ZnDy(L6)(DBM) <sub>3</sub> ]                                                                                     | TTD-8                           | 2.670                      | a<br>36.5 (2000)      | -                                                | [6]  |
|                                                                    | [R,R-ZnL7Dy(OAc)(NO <sub>3</sub> ) <sub>2</sub> ]                                                                 | CSAPR-9                         | 4.762 (Dy1)<br>5.179 (Dy2) | 19.40, 51.82 (1500)   | -                                                | [7]  |
|                                                                    | [S,S-ZnL7Dy(OAc)(NO <sub>3</sub> ) <sub>2</sub> ]                                                                 | CSAPR-9                         | 4.749 (Dy1)<br>5.171 (Dy2) | 20.48, 51.72 (1500)   | -                                                | [7]  |
|                                                                    | [ZnDy(NO <sub>3</sub> ) <sub>2</sub> (mpko) <sub>3</sub> (mpkoH)]                                                 | CSAPR-9                         | 2.348                      | a<br>33.3(1000)       | -                                                | [8]  |
|                                                                    | [ZnDy(H <sub>2</sub> O)(phen)(mb) <sub>5</sub> ]                                                                  | TDD-8                           | 2.29                       | a<br>10 (1500)        | -                                                | [9]  |
|                                                                    | [(L8ZnBrDy(ovan)(NO <sub>3</sub> )(H <sub>2</sub> O))(H <sub>2</sub> O)·0.5(MeOH)]                                | MFF-9                           | 0.992                      | 119<br>211 (1000)     | c                                                | [10] |
|                                                                    | [L8ZnClDy(thd) <sub>2</sub> ]                                                                                     | BTPR-8                          | 1.907                      | 99.7<br>160 (1000)    | c                                                | [10] |
|                                                                    | [Zn(μ-L)(μ-OAc)Dy(NO <sub>3</sub> ) <sub>2</sub> ]·CH <sub>3</sub> CN                                             | CSAPR-9                         | 1.18                       | a<br>41.55 (1000)     | -                                                | [11] |
|                                                                    | [ZnLn(L9H <sub>4</sub> ) <sub>2</sub> ](NO <sub>3</sub> ) <sub>3</sub> ·6H <sub>2</sub> O                         | SAPR-8                          | 0.619                      | 272                   | c                                                | [12] |
| [Zn(μ-L6)(μ-OAc)Ln(NO <sub>3</sub> ) <sub>2</sub> ]                | CSAPR-9<br>MFF-9                                                                                                  | 2.196 (Dy1)<br>2.640 (Dy2)      | 27.5 (1000)                | -                     | [13]                                             |      |
| ZnDyZn                                                             | [Dy{Zn(L2)(OAc)} <sub>2</sub> ]BPh <sub>4</sub> ·CH <sub>3</sub> CN                                               | JSPC-10                         | 1.467                      | 6.4, 22.4 (1000)      | -                                                | [14] |
|                                                                    | [Zn <sub>2</sub> Dy(L10) <sub>2</sub> (MeOH)]NO <sub>3</sub> ·3MeOH·H <sub>2</sub> O                              | PBPY-7                          | 0.610                      | 439                   | 11(0.02)                                         | [15] |
|                                                                    | [Zn <sub>2</sub> Dy(L10) <sub>2</sub> ]NO <sub>3</sub> ·H <sub>2</sub> O                                          | OC-6                            | 1.879                      | 64 (1200)             | 2 (0.002)                                        | [15] |
|                                                                    | [Zn <sub>2</sub> Dy(L) <sub>2</sub> Cl <sub>2</sub> ][ZnCl <sub>3</sub> (CH <sub>3</sub> OH)]·3CH <sub>3</sub> OH | SAPR-8                          | 0.927                      | 140<br>148 (1000)     | c                                                | [16] |
|                                                                    | [Dy(ZnL11) <sub>2</sub> (OAc)Cl <sub>2</sub> ]·CH <sub>2</sub> Cl <sub>2</sub>                                    | TDD-8                           | 2.699                      | a<br>19 (700)         | -                                                | [17] |
|                                                                    | [ZnCl(μ-L)Dy(μ-L)ClZn]PF <sub>6</sub>                                                                             | SAPR-8                          | 0.547                      | 268<br>319 (1000)     | c                                                | [18] |
|                                                                    | [(L11Zn(H <sub>2</sub> O)) <sub>2</sub> Dy(H <sub>2</sub> O)](CF <sub>3</sub> SO <sub>3</sub> ) <sub>3</sub>      | MFF-9                           | 2.582 (Dy1)<br>2.383 (Dy2) | 139<br>185 (1000)     | c                                                | [19] |
|                                                                    | [(L11ZnBr) <sub>2</sub> Dy(H <sub>2</sub> O)](ClO <sub>4</sub> )                                                  | TCTPR-9                         | 1.895 (Dy1)<br>2.068 (Dy2) | 211<br>309 (1000)     | c                                                | [19] |
|                                                                    | [(L11ZnCl) <sub>2</sub> Dy(H <sub>2</sub> O)](ClO <sub>4</sub> )·1.25MeOH                                         | TCTPR-9                         | 1.716 (Dy1)<br>1.996 (Dy2) | 210<br>291 (1000)     | c                                                | [19] |
|                                                                    | [Zn <sub>2</sub> Dy(L12H <sub>3</sub> ) <sub>4</sub> ]·3NO <sub>3</sub> ·2MeOH·1.5H <sub>2</sub> O                | SAPR-8                          | 0.917                      | a<br>67 (1000)        | c                                                | [20] |
|                                                                    | {[Dy[Zn(L13)Cl] <sub>2</sub> (DMF) <sub>2</sub> ]·Cl}                                                             | SAPR-8                          | 5.663                      | a (2000)              | -                                                | [21] |
| [(L14ZnBr) <sub>2</sub> Dy(MeOH) <sub>2</sub> ](ClO <sub>4</sub> ) | TDD-8                                                                                                             | 1.060                           | 63.7<br>95.5 (1000)        | c                     | [10]                                             |      |

|               |                                                                                                                           |         |       |                                             |   |      |
|---------------|---------------------------------------------------------------------------------------------------------------------------|---------|-------|---------------------------------------------|---|------|
|               | $[\text{Zn}_2(\text{L15})_2\text{DyCl}_3] \cdot 2\text{H}_2\text{O}$                                                      | MFF-9   | 3.321 | 430 <sup>d</sup><br>481 (1000) <sup>d</sup> | 8 | [22] |
|               | $[\text{Zn}_2(\text{L15})_2\text{Dy}(\text{MeOH})\text{Br}_3] \cdot 3\text{H}_2\text{O}$                                  | MFF-9   | 2.635 | 233                                         | 6 | [22] |
|               | $[\text{Zn}_2(\text{L15})_2\text{Dy}(\text{H}_2\text{O})\text{Br}_2] \cdot [\text{ZnBr}_4]_{0.5}$                         | CSAPR-9 | 2.115 | 121                                         | 4 | [22] |
|               | $[\text{Zn}_2(\text{L16})_2\text{DyCl}_3] \cdot 2\text{H}_2\text{O}$                                                      | MFF-9   | 3.280 | 398 <sup>d</sup>                            | 8 | [22] |
| $>2\text{Zn}$ | $[\text{Zn}_3\text{Dy}(\text{L17})(\text{NO}_3)_3(\text{MeOH})_3] \cdot 4\text{H}_2\text{O}$                              | HH-9    | 3.726 | <sup>a</sup><br>25.8 (1500)                 | - | [23] |
|               | $[\text{DyZn}_6(\mu_3\text{-OH})(\text{Gly})_6(\mu_2\text{-NO}_3)_3](\text{OH})(\text{NO}_3)_2 \cdot 8\text{H}_2\text{O}$ | TCTPR-9 | 0.205 | <sup>a</sup><br>37.04 (5000)                | - | [24] |

<sup>a</sup> Maxima of the out-of-phase component of ac susceptibility is beyond the window of measurement.

<sup>b</sup> The  $T_B$  is below the limit of the measurement (2 K).

<sup>c</sup> Hysteresis loops are observed at 2 K but are not measured at higher temperatures.

<sup>d</sup> Values obtained taking into account the simultaneous presence of Orbach and Raman relaxation processes.

Summary of the ligands:

**H<sub>2</sub>L1:** a Schiff-base ligand formed by a condensation reaction of o-vaniline and 2,2-dimethylpropanediamine in a 2:1 ratio. Hsal: salicylaldehyde.

**H<sub>2</sub>L2:** N,N'-bis(3-methoxysalicylidene)-1,2-diaminoethane.

**H<sub>2</sub>L3:** N,N'-bis(3-methoxysalicylidene)-1,2-cyclohexanediamine.

**H<sub>2</sub>L4:** N,N',N''-trimethyl-N,N''-bis(2-hydroxy-3-methoxy-5-methylbenzyl)diethylene-triamine. H-9-An: 9-anthracene carboxylic acid.

**HL5:** 2-methoxy-6-[(E)-phenyliminomethyl]phenol.

**H<sub>2</sub>L6:** N,N'-dimethyl-N,N'-bis(2-hydroxy-3-methoxy-5-methylbenzyl)-ethylenediamine

HDBM: 1,3-diphenyl-propane-1,3-dione

**H<sub>2</sub>L7:** phenol,2,2' [2,2-diphenyl-1,2-ethanediyl]bis[(E)-nitrilomethylidyne]-bis(6-methoxy).

mpkoH: methyl 2-pyridyl ketone oxime.

mb: m-methylbenzoate, phen: 1,10-phenanthroline.

**H<sub>2</sub>L8:** N,N'-2,2-dimethylpropylenedi(3-methoxysalicylideneiminato). Ovan: ovanillin.

Thd: 2,2,6,6-tetramethyl-3,5-heptanedionato.

**H<sub>3</sub>L9:** bi-compartmental ligand obtained by reaction of 2-formyl-6-hydroxymethyl-p-cresol with 1,3-diamino-2-propanol.

**H<sub>3</sub>L10:** 2,2',2''-(((nitrilotris(ethane-2,1-diyl))tris(azanediyl))tris(methylene))tris-(4-bromophenol).

**H<sub>2</sub>L11:** N,N'-2,2-dimethylpropylenedi(3-methoxysalicylideneiminato).

**H<sub>4</sub>L12:** [2-(2-hydroxy-3-(hydroxymethyl)-5-methylbenzylideneamino)-2-methylpropane-1,3-diol].

**H<sub>2</sub>L13:** N,N'-bis(3-methoxysalicylidene)benzene-1,2-diamine.

**H<sub>2</sub>L14:** 2-[(E)-[(3-[(2E,3E)-3-(hydroxyimino)butan-2-ylidene]amino)-2,2-dimethylpropyl]imino]methyl]-6-methoxyphenol.

**H<sub>2</sub>L15:** N,N'-bis(3-methoxysalicylidene)phenylene-1,2-diamine.

**H<sub>2</sub>L16:** N,N'-bis(3-methoxysalicylidene)-1,2-diaminocyclohexane.

**H<sub>6</sub>L17:** macrocyclic ligand.

Gly = glycine

## References

---

- <sup>1</sup> A. Watanabe, A. Yamashita, M. Nakano, T. Yamamura and T. Kajiwara, *Chem. Eur. J.*, 2011, **17**, 7428-7432.
- <sup>2</sup> J. Long, R. Vallat, R. A. S. Ferreira, L. D. Carlos, F. A. A. Paz, Y. Guari and J. Larionova, *Chem. Commun.*, 2012, **48**, 9974-9976.
- <sup>3</sup> P. Zhang, L. Zhang, S.-Y. Lin and J. Tang, *Inorg. Chem.*, 2013, **52**, 6595-6602.
- <sup>4</sup> M. A. Palacios, S. Titos-Padilla, J. Ruiz, J. M. Herrera, S. J. A. Pope, E. K. Brechin and E. Colacio, *Inorg. Chem.*, 2014, **53**, 1465-1474.
- <sup>5</sup> A. Upadhyay, S. K. Singh, C. Das, R. Mondol, S. K. Langley, K. S. Murray, G. Rajaraman and M. Shanmugam, *Chem. Commun.*, 2014, **50**, 8838-8841.
- <sup>6</sup> Q.-W. Xie, S.-Q. Wu, W.-B. Shi, C.-M. Liu, A.-L. Cui and H.-Z. Kou, *Dalton Trans.*, 2014, **43**, 11309-11316.
- <sup>7</sup> J. Long, J. Rouquette, J.-M. Thibaud, R. A. S. Ferreira, L. D. Carlos, B. Donnadiou, V. Vieru, L. F. Chibotaru, L. Konczewics, J. Haines, Y. Guari and J. Larionova, *Angew. Chem. Int. Ed.*, 2015, **54**, 2236-2240.
- <sup>8</sup> N. C. Anastasiadis, C. D. Polyzou, G. E. Kostakis, V. Bekiari, Y. Lan, S. P. Perlepes, K. F. Konidaris and A. K. Powell, *Dalton Trans.*, 2015, **44**, 19791-19795.
- <sup>9</sup> Y. Li, C. Zhang, J.-W. Yu, E.-C. Yang and X.-J. Zhao, *Inorg. Chim. Acta*, 2016, **445**, 110-116.
- <sup>10</sup> J. P. Costes, S. Titos-Padilla, I. Oyarzabal, T. Gupta, C. Duhayon, G. Rajaraman and E. Colacio, *Inorg. Chem.*, 2016, **55**, 4428-4440.
- <sup>11</sup> I. Oyarzabal, B. Artetxe, A. Rodríguez-Diéguez, J. A. García, J. M. Seco and E. Colacio, *Dalton Trans.*, 2016, **45**, 9712-9726.
- <sup>12</sup> A. Amjad, A. M. Madalan, M. Andruh, A. Caneschi and L. Sorace, *Chem. Eur. J.*, 2016, **22**, 12849-12858.
- <sup>13</sup> A. Zabala, J. Cepeda, I. Oyarzabal, A. Rodríguez-Diéguez, J. A. García, J. M. Seco and E. Colacio, *CrystEngComm*, 2017, **19**, 256-264..
- <sup>14</sup> M. Maeda, S. Hino, K. Yamashita, Y. Kataoka, M. Nakano, T. Yamamura and T. Kajiwara, *Dalton Trans.*, 2012, **41**, 13640-13648.
- <sup>15</sup> J.-L. Liu, Y.-C. Chen, Y.-Z. Zheng, W.-Q. Lin, L. Ungur, W. Wernsdorfer, L. F. Chibotaru and M.-L. Tong, *Chem. Sci.*, 2013, **4**, 3310-3316.
- <sup>16</sup> I. Oyarzabal, J. Ruiz, J. M. Seco, M. Evangelisti, A. Camón, E. Ruiz, D. Aravena and E. Colacio, *Chem. Eur. J.*, 2014, **20**, 14262-14269.
- <sup>17</sup> P.-Y. Shan, H.-F. Li, P. Chen, Y.-M. Tian, W.-B. Sun and P.-F. Yan, *Z. Anorg. Allg. Chem.*, 2015, **641**, 1119-1124.
- <sup>18</sup> I. Oyarzabal, J. Ruiz, E. Ruiz, D. Aravena, J. M. Seco and E. Colacio, *Chem.*

---

*Commun.*, 2015, **51**, 12353-12356.

<sup>19</sup> J. P. Costes, S. Titos-Padilla, I. Oyarzabal, T. Gupta, C. Duhayon, G. Rajaraman and E. Colacio, *Chem. Eur. J.*, 2014, **20**, 14262-14269.

<sup>20</sup> S. Das, K. S. Bejoymohandas, A. Dey, S. Biswas, M. L. P. Reddy, R. Morales, E. Ruiz, S. Titos-Padilla, E. Colacio and V. Chandrasekhar, *Chem. Eur. J.*, 2015, **21**, 6449-6464.

<sup>21</sup> Q. Ma, S. Zeng, X. Feng, W. Cao, H. Wang, J. Dou and J. Jiang, *Eur. J. Inorg. Chem.*, 2016, 4194-4198.

<sup>22</sup> W.-B. Sun, P.-F. Yan, S.-D. Jiang, B.-W. Wang, Y.-Q. Zhang, H.-F. Li, P. Chen, Z.-M. Wanga, S. Gao, *Chem. Sci.*, 2016, **7**, 684-691.

<sup>23</sup> H. L. C. Feltham, Y. Lan, F. Klöwer, L. Ungur, L. F. Chibotaru, A. K. Powell, S. Brooker, *Chem. Eur. J.*, 2011, **17**, 4362-4365.

<sup>24</sup> G. Xiong, X.-Y. Qin, P.-F. Shi, Y.-L. Hou, J.-Z. Cui, B. Zhao, *Chem. Commun.*, 2014, **50**, 4255-4257.
